# Supplementary material
Source: publisher figshare collection journal article supplement (https://tandf.figshare.com/ndownloader/files/20999721)
Supplement: Supplementary file 1 [file 20999721]

**Supplementary Material**

Variable structural bonding modes and antibacterial studies of thiosemicarbazone ligands of ruthenium, rhodium and iridium metal complexes

LATHEWDEIPOR SHADAP, VENKANNA BANOTHU, **UMA ADEPALLY, SANJAY ADHIKARI and** MOHAN RAO KOLLIPARA*

**Contents**

**Figure S1**. 1H NMR spectrum of complex **1**

**Figure S2**. 1H NMR spectrum of complex **2**

**Figure S3**. 1H NMR spectrum of complex **4**

**Figure S4**. 1H NMR spectrum of complex **5**

**Figure S5**. 1H NMR spectrum of complex **6**

**Figure S6**. 1H NMR spectrum of complex **7**

**Figure S7**. 1H NMR spectrum of complex **8**

**Figure S8**. 1H NMR spectrum of complex **9**

**Figure S9**. 13C NMR spectrum of complex **1**

**Figure S10**. 13C NMR spectrum of complex **5**

**Figure S11**. 13C NMR spectrum of complex **6**

**Figure S12**. 13C NMR spectrum of complex **8**

**Figure S13**. Mass spectrum of complex **1**

**Figure S14**. Mass spectrum of complex **2**

**Figure S15**. Mass spectrum of complex **3**

**Figure S16**. Mass spectrum of complex **4**

**Figure S17**. Mass spectrum of complex **5**

**Figure S18**. Mass spectrum of complex **6**

**Figure S19**. Mass spectrum of complex **7**

**Figure S20**. Mass spectrum of complex **8**

**Figure S21**. Mass spectrum of complex **9**

**Figure S22**. UV-Visible spectrum of complexes **1-9**

**Figure S23**. Ball and stick diagram of complex **1** presented just to show the mode of bonding.Hydrogen atoms (except NH protons) and counter ions have been omitted for clarity.

**Figure S24**. Ball and stick diagram of complex **8** presented just to show the mode of bonding.Hydrogen atoms (except NH protons) and counter ions have been omitted for clarity.

**Figure S25**.Antibacterial results of the compoundsagainst gram-positive and gram-negative bacteria strains with ciprofloxacin as the reference.

**Figure** **S26**.The minimum inhibitory concentration (MIC)and minimum bactericidal concentration (MBC) of the tested compounds.


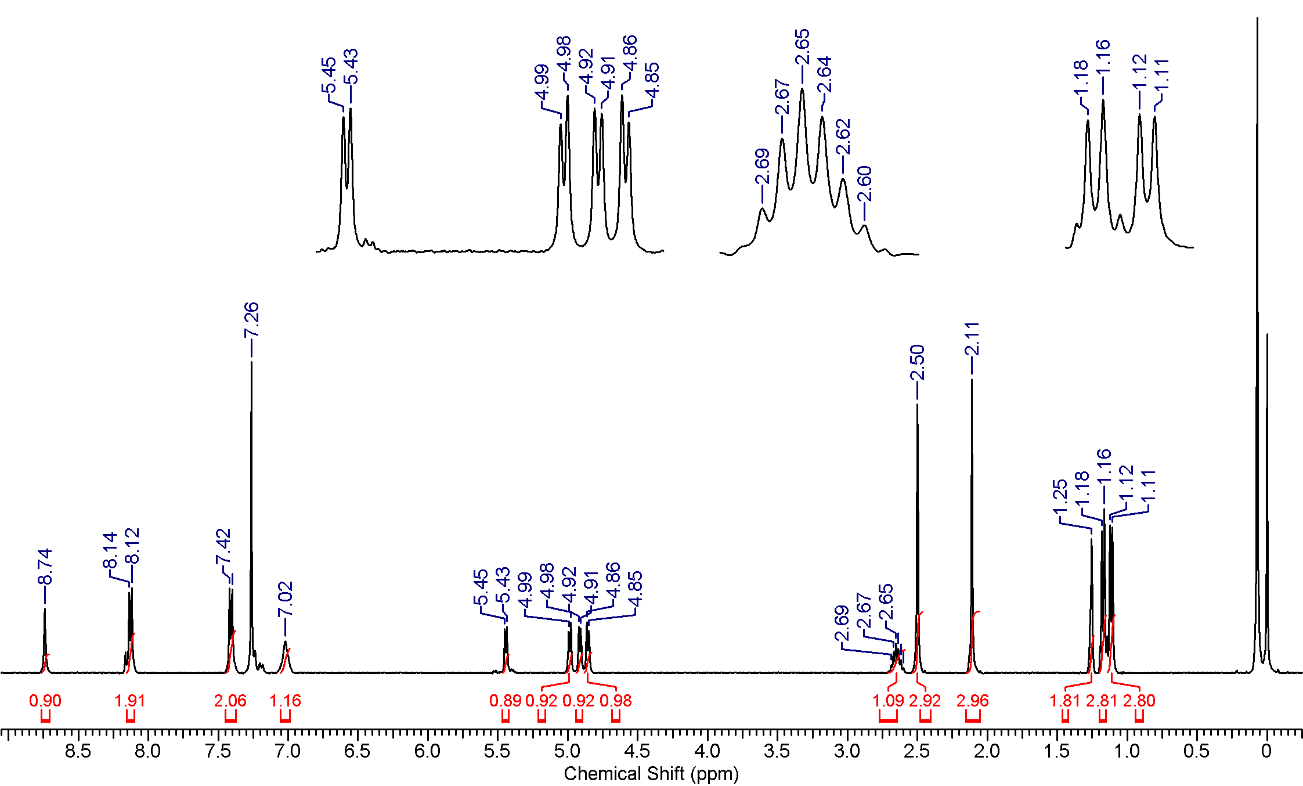


**Figure S1**. 1H NMR spectrum of complex **1**.


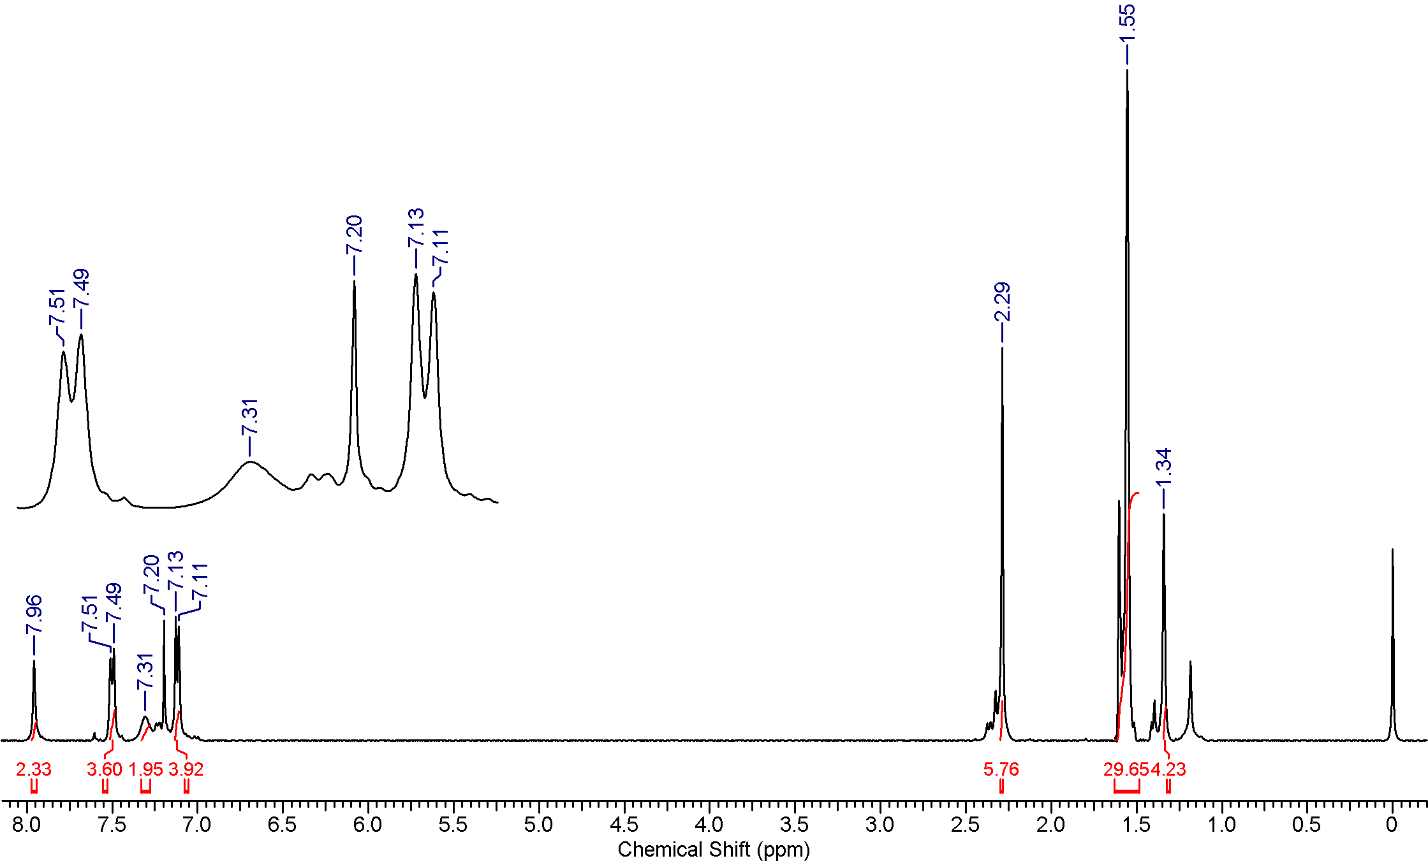


**Figure S2**. 1H NMR spectrum of complex **2**.

**

**

**Figure S3**. 1H NMR spectrum of complex **4**.

**

**

**Figure S4**. 1H NMR spectrum of complex **5**.

**

**

**Figure S5**. 1H NMR spectrum of complex **6**.

**

**

**Figure S6**. 1H NMR spectrum of complex **7**.


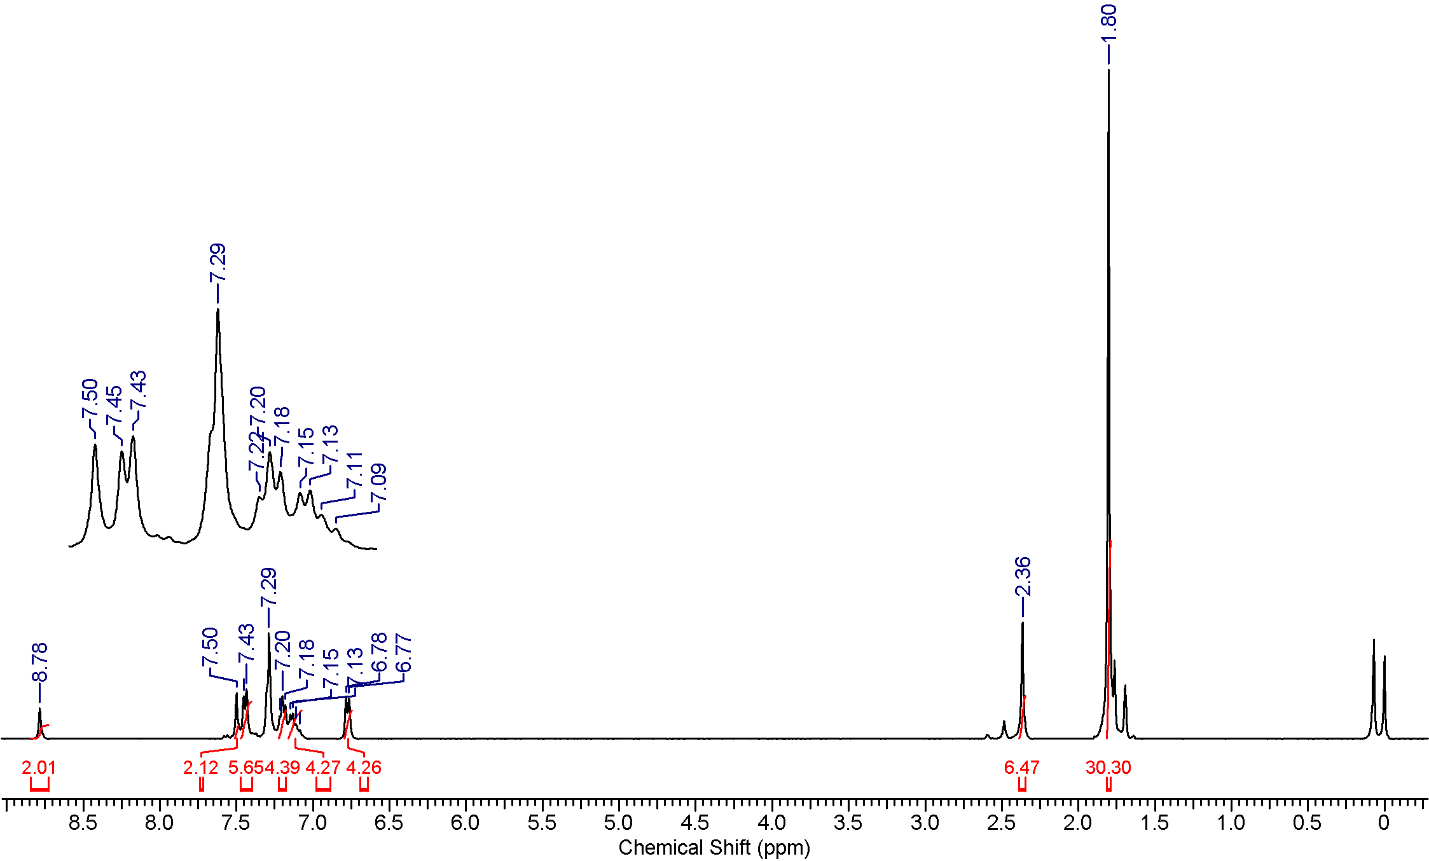


**Figure S7**. 1H NMR spectrum of complex **8**.

**

**

**Figure S8**. 1H NMR spectrum of complex **9**.

**

**

**Figure S9**. 13C NMR spectrum of complex **1**.

**
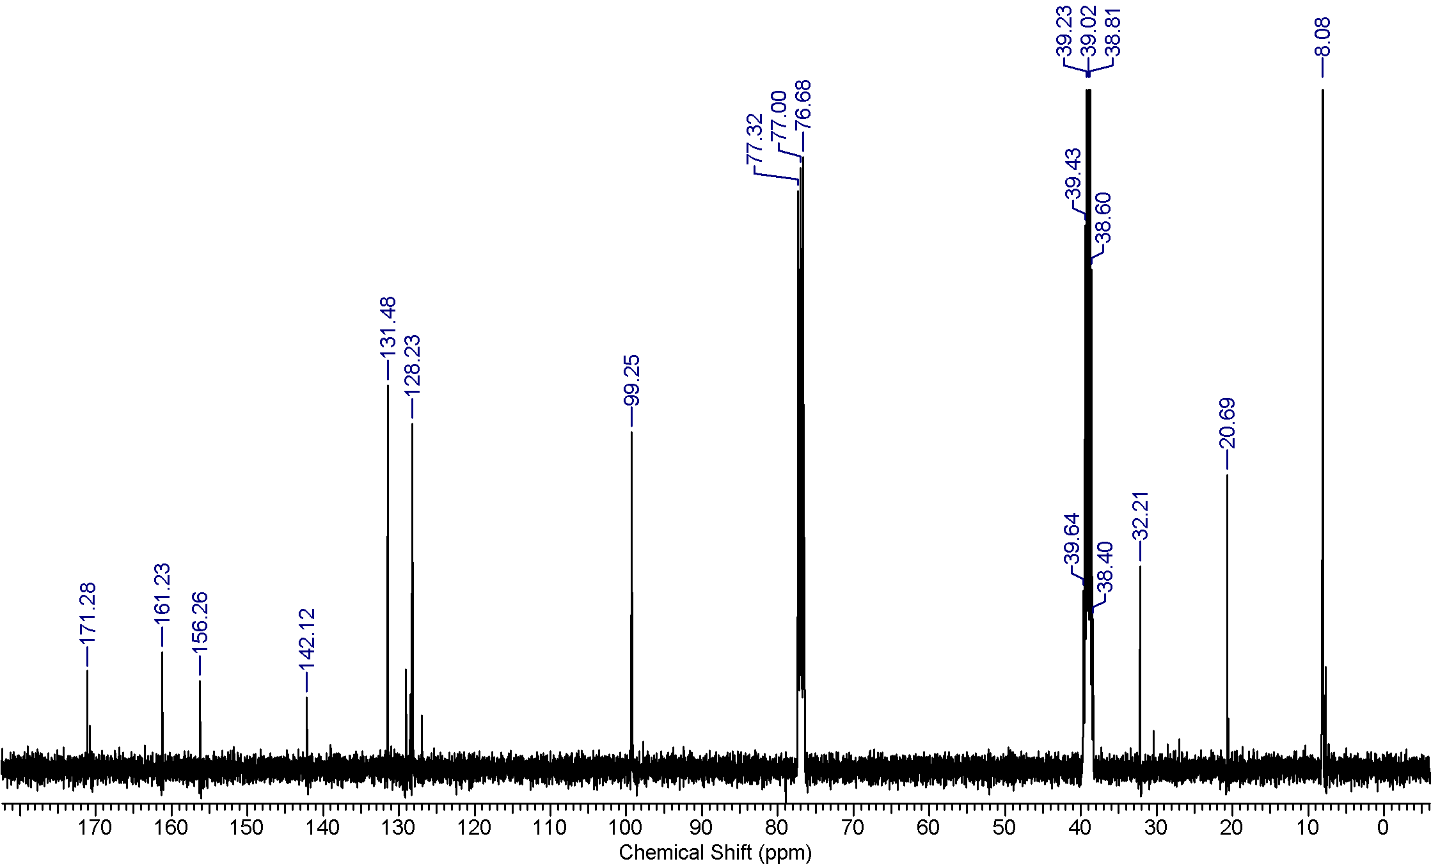
**

**Figure S10**. 13C NMR spectrum of complex **5**.





**Figure S11**. 13C NMR spectrum of complex **6**.


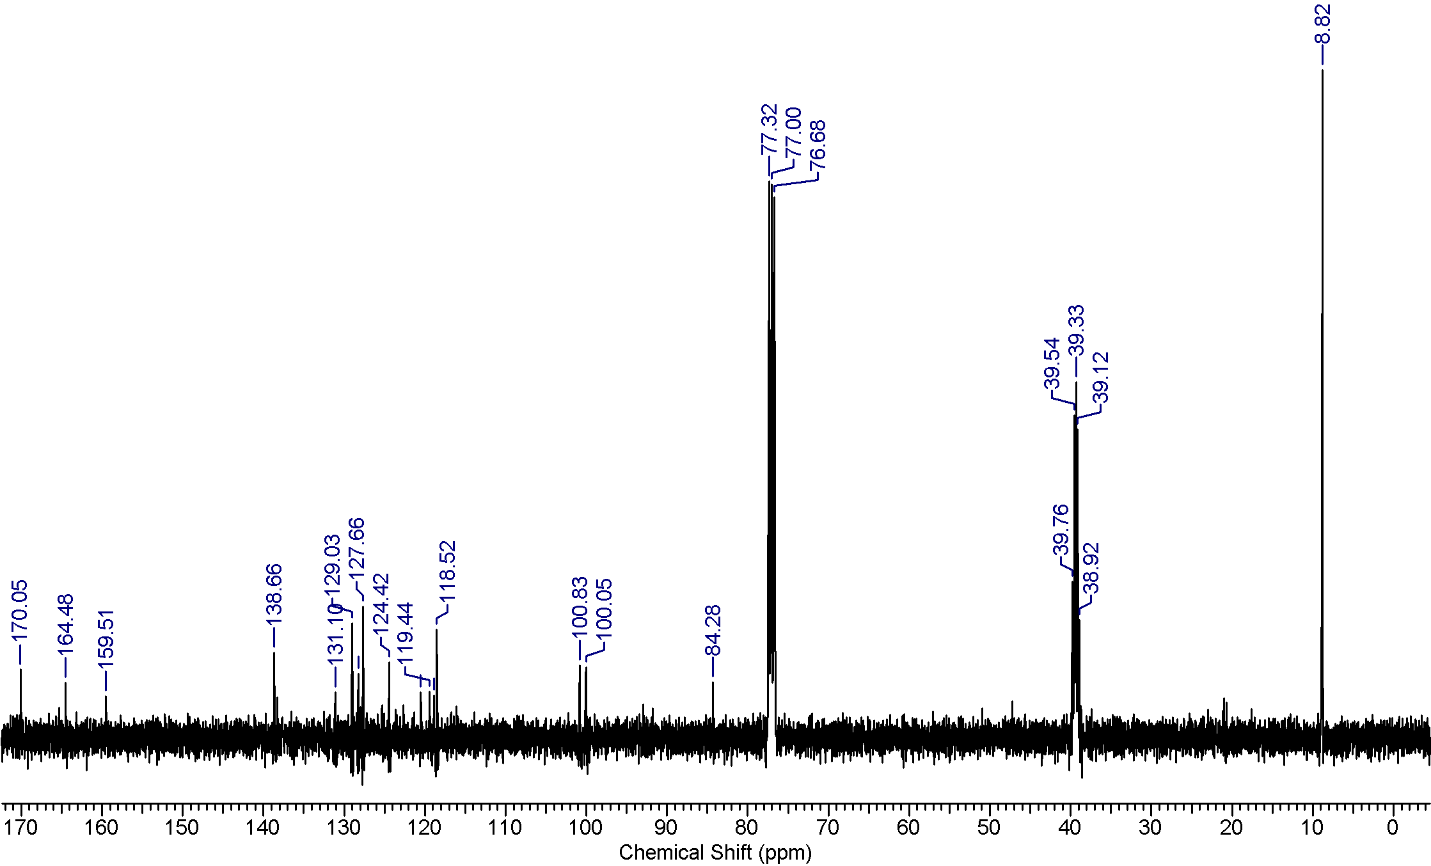


**Figure S12**. 13C NMR spectrum of complex **8**.

**
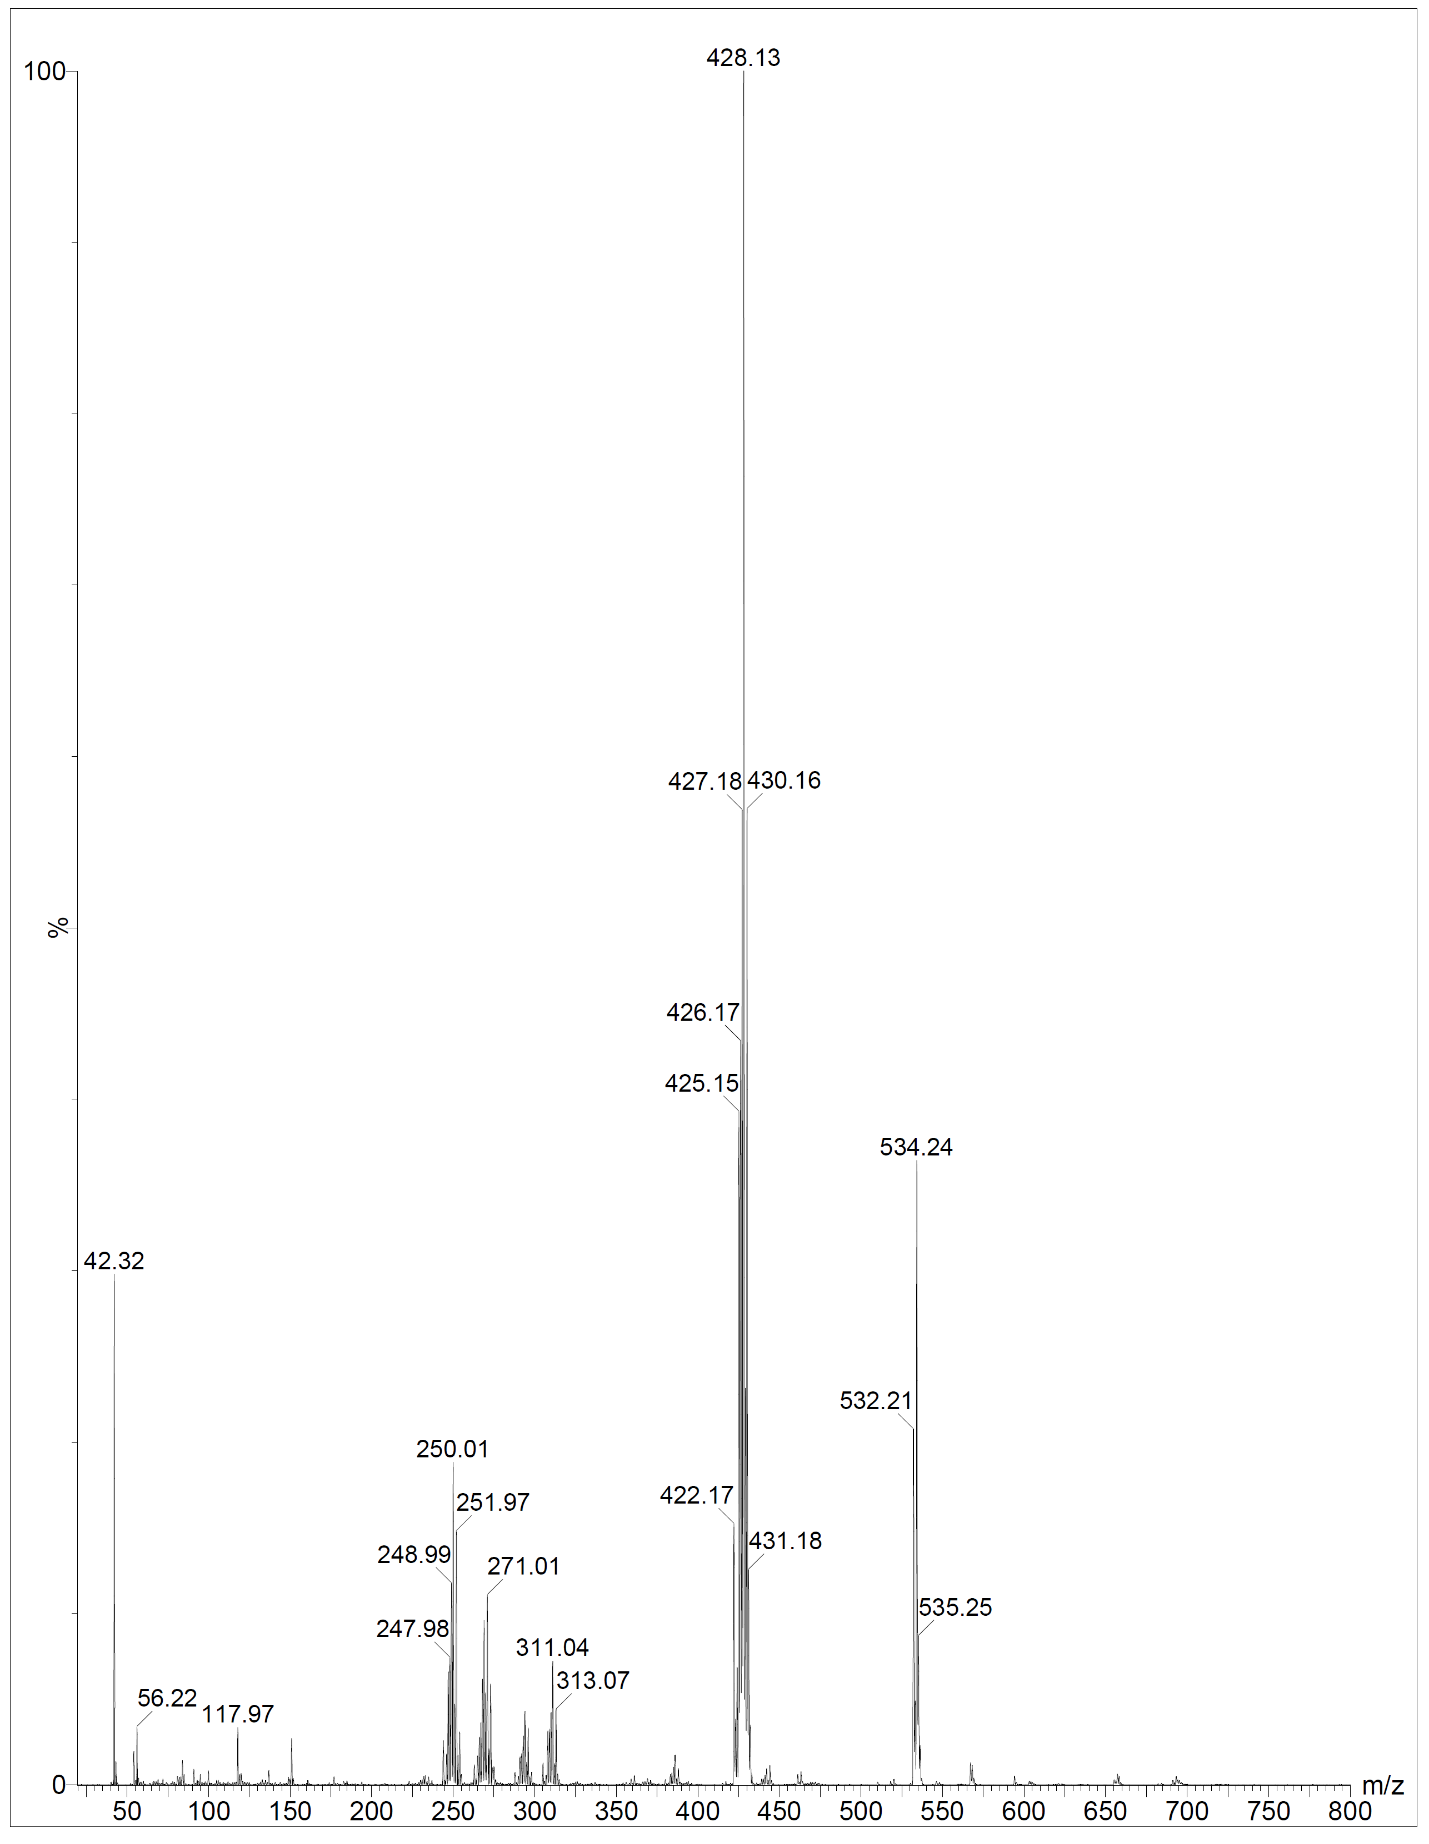
**

**Figure S13**. Mass spectrum of complex **1**.

**
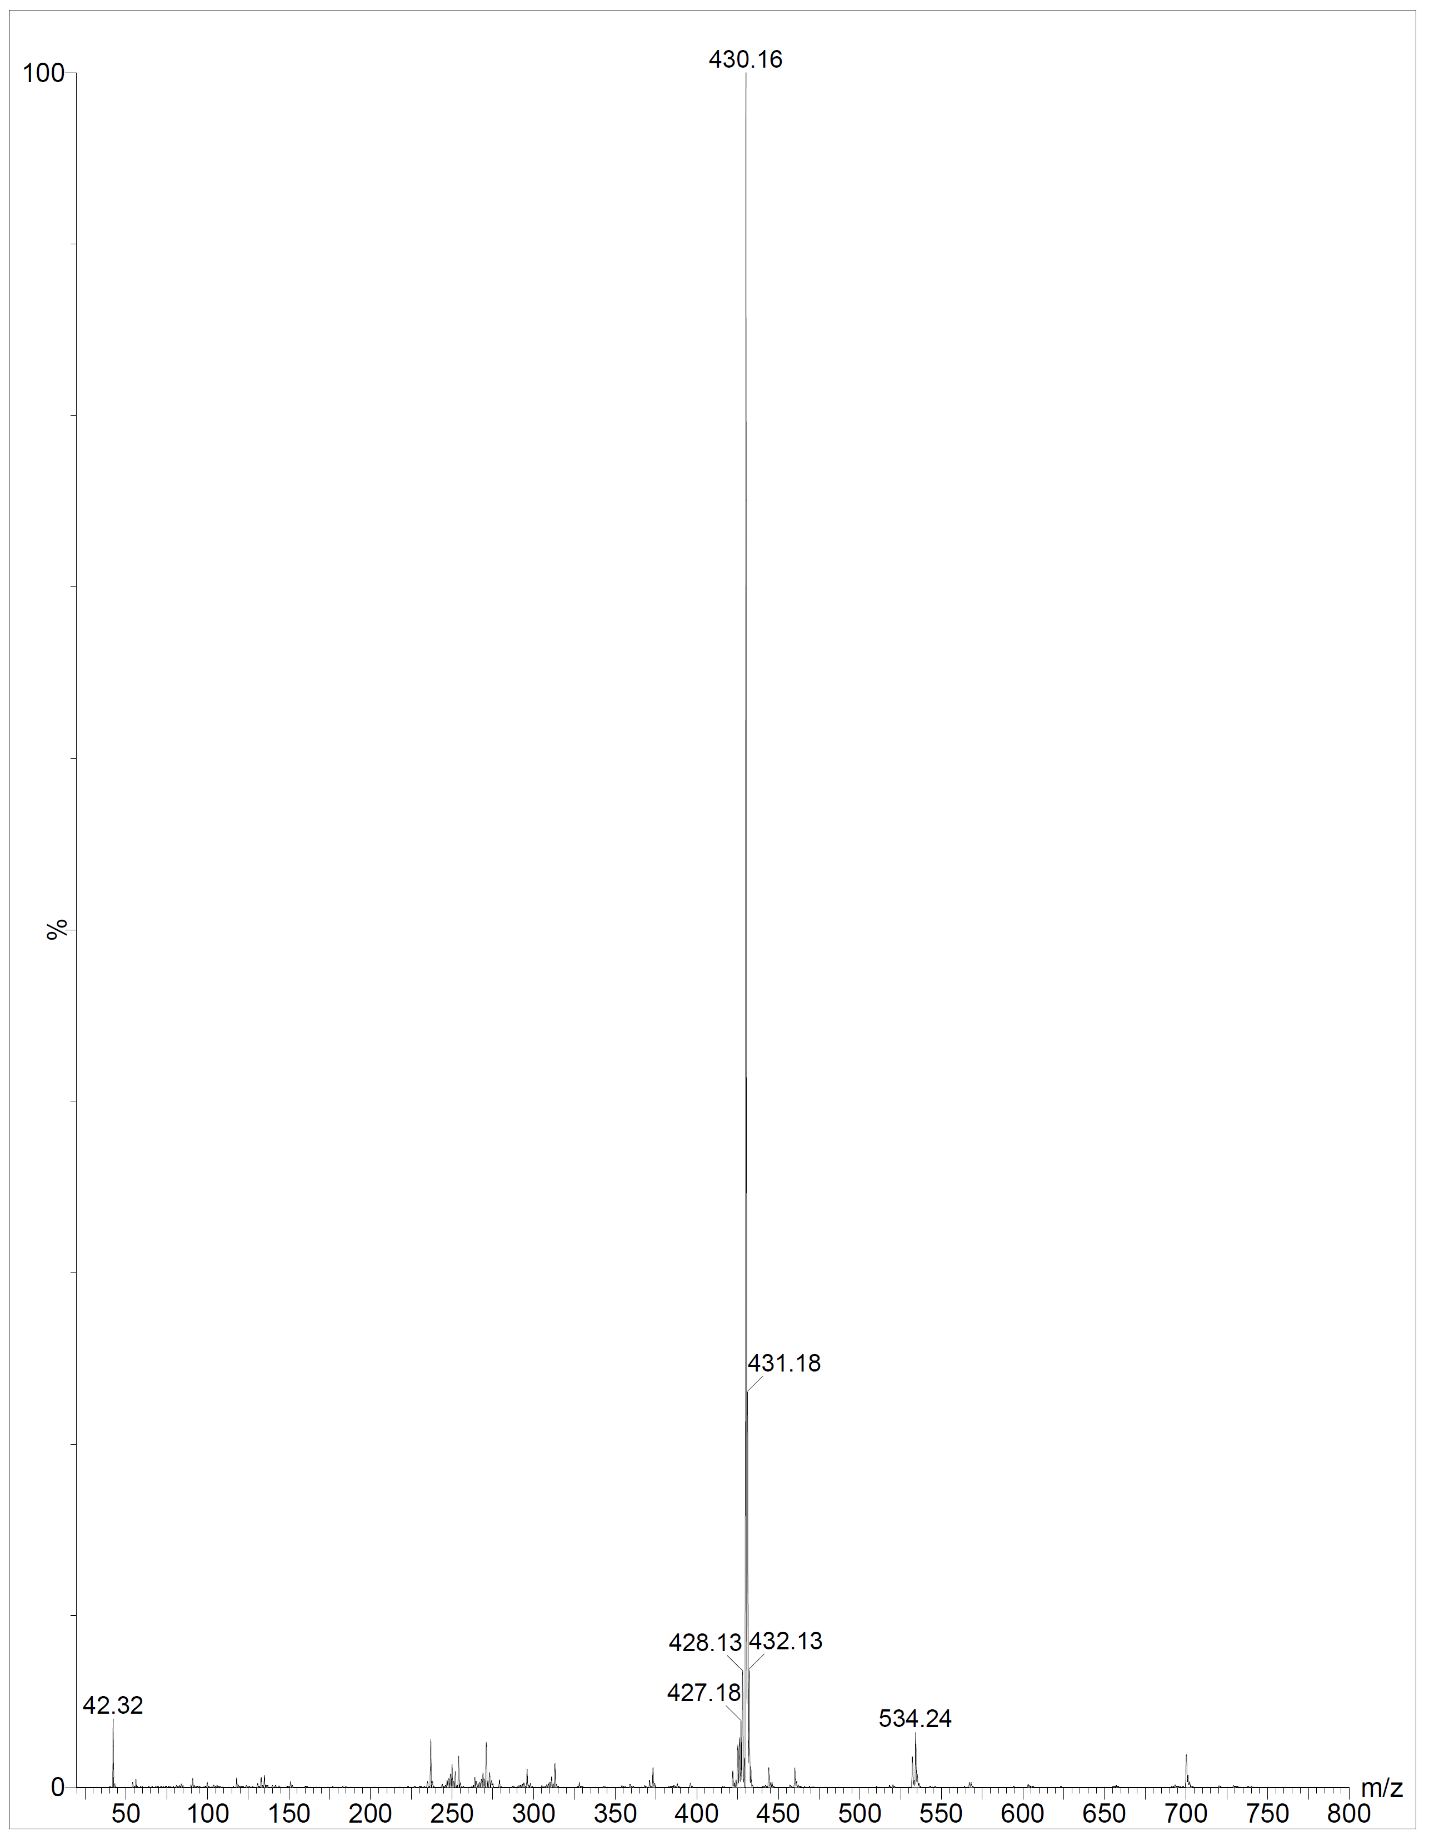
**

**Figure S14**. Mass spectrum of complex **2**.

**
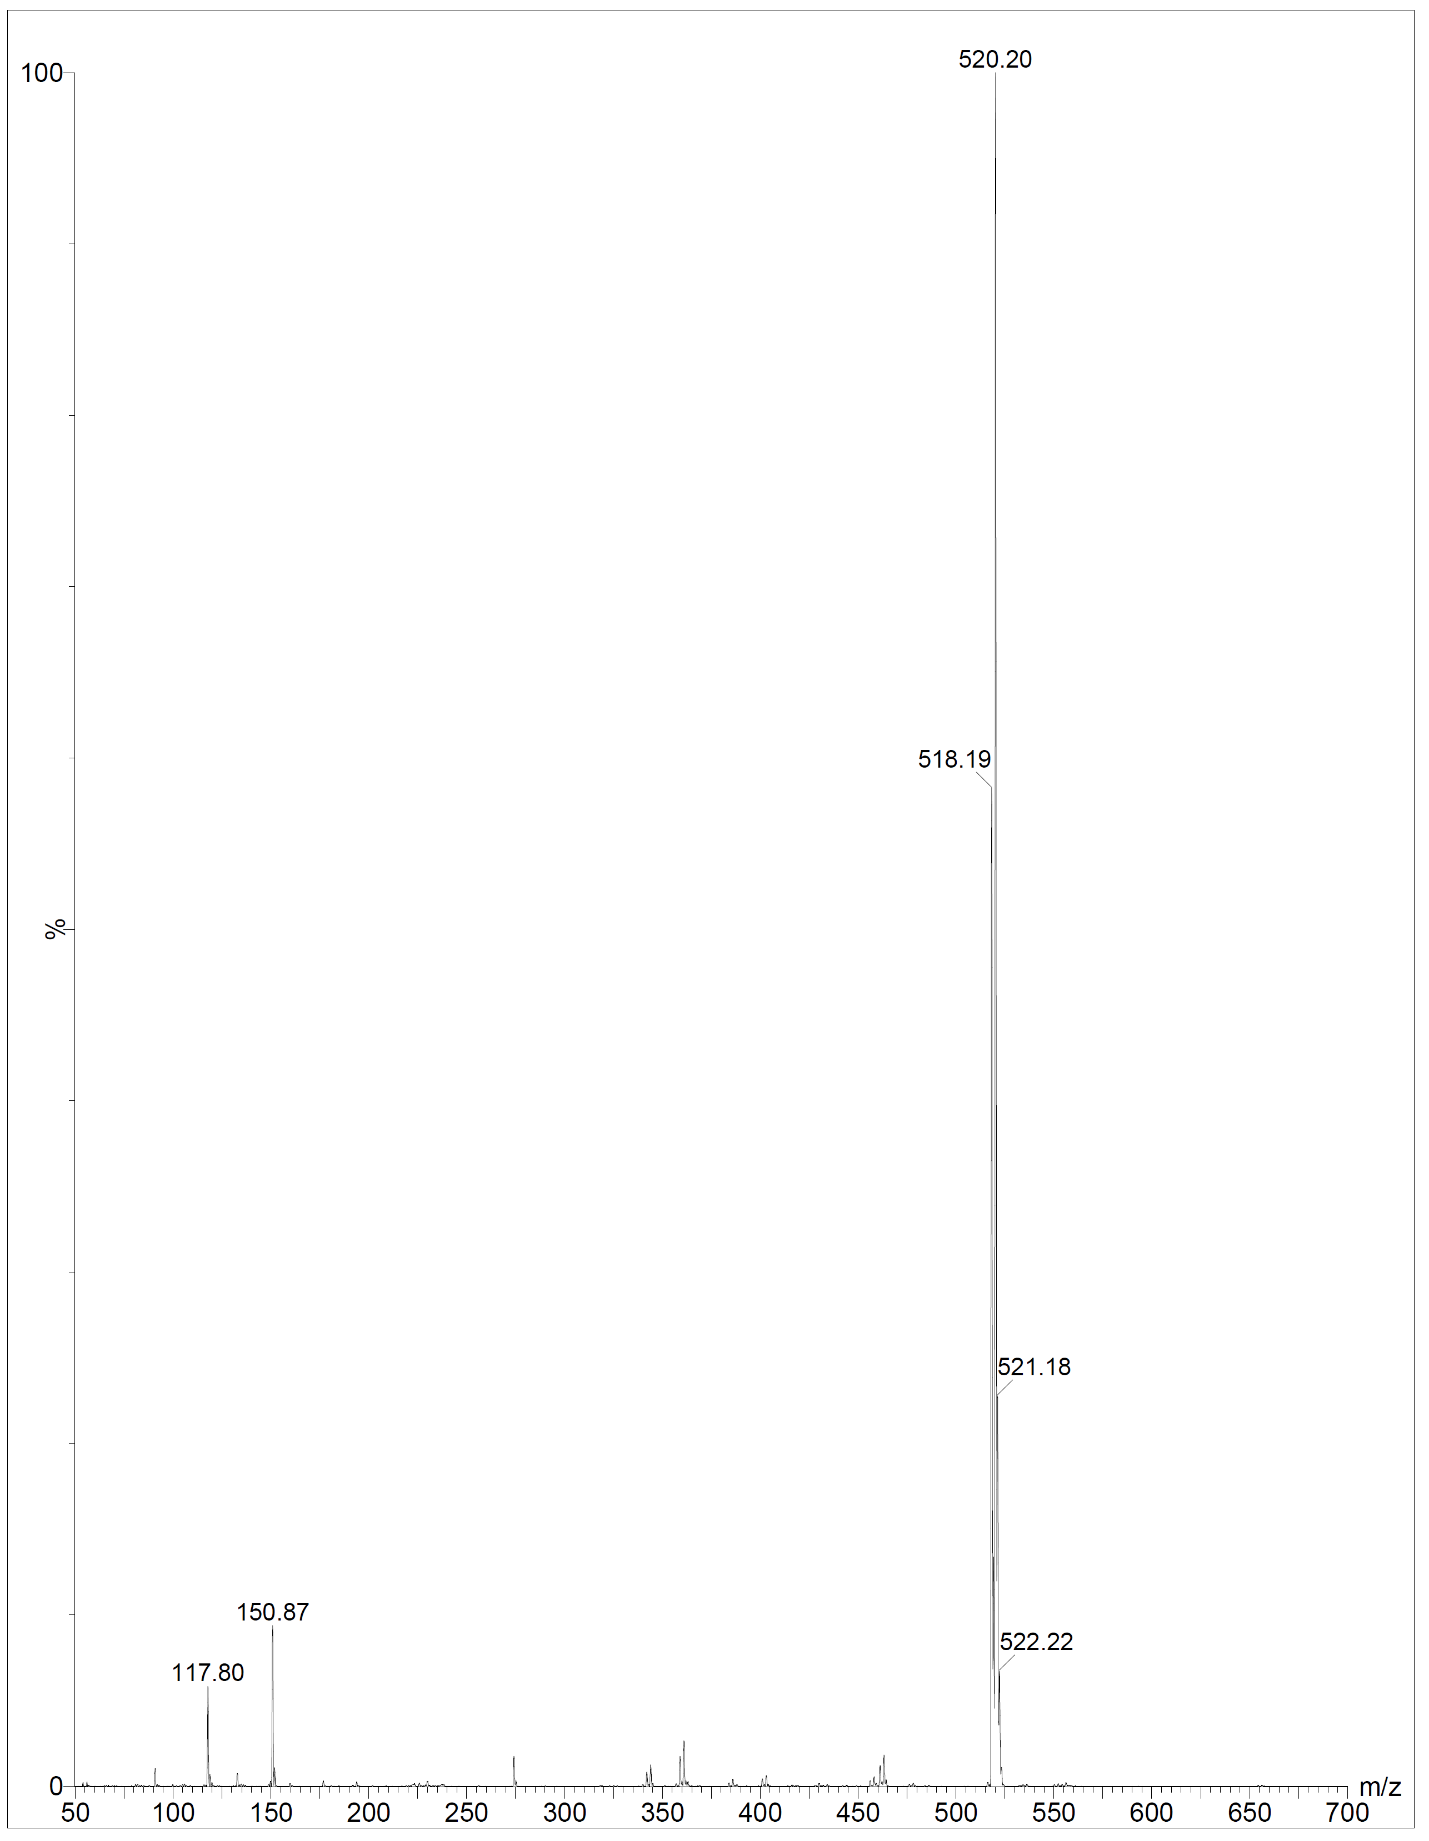
**

**Figure S15**. Mass spectrum of complex **3**.

**
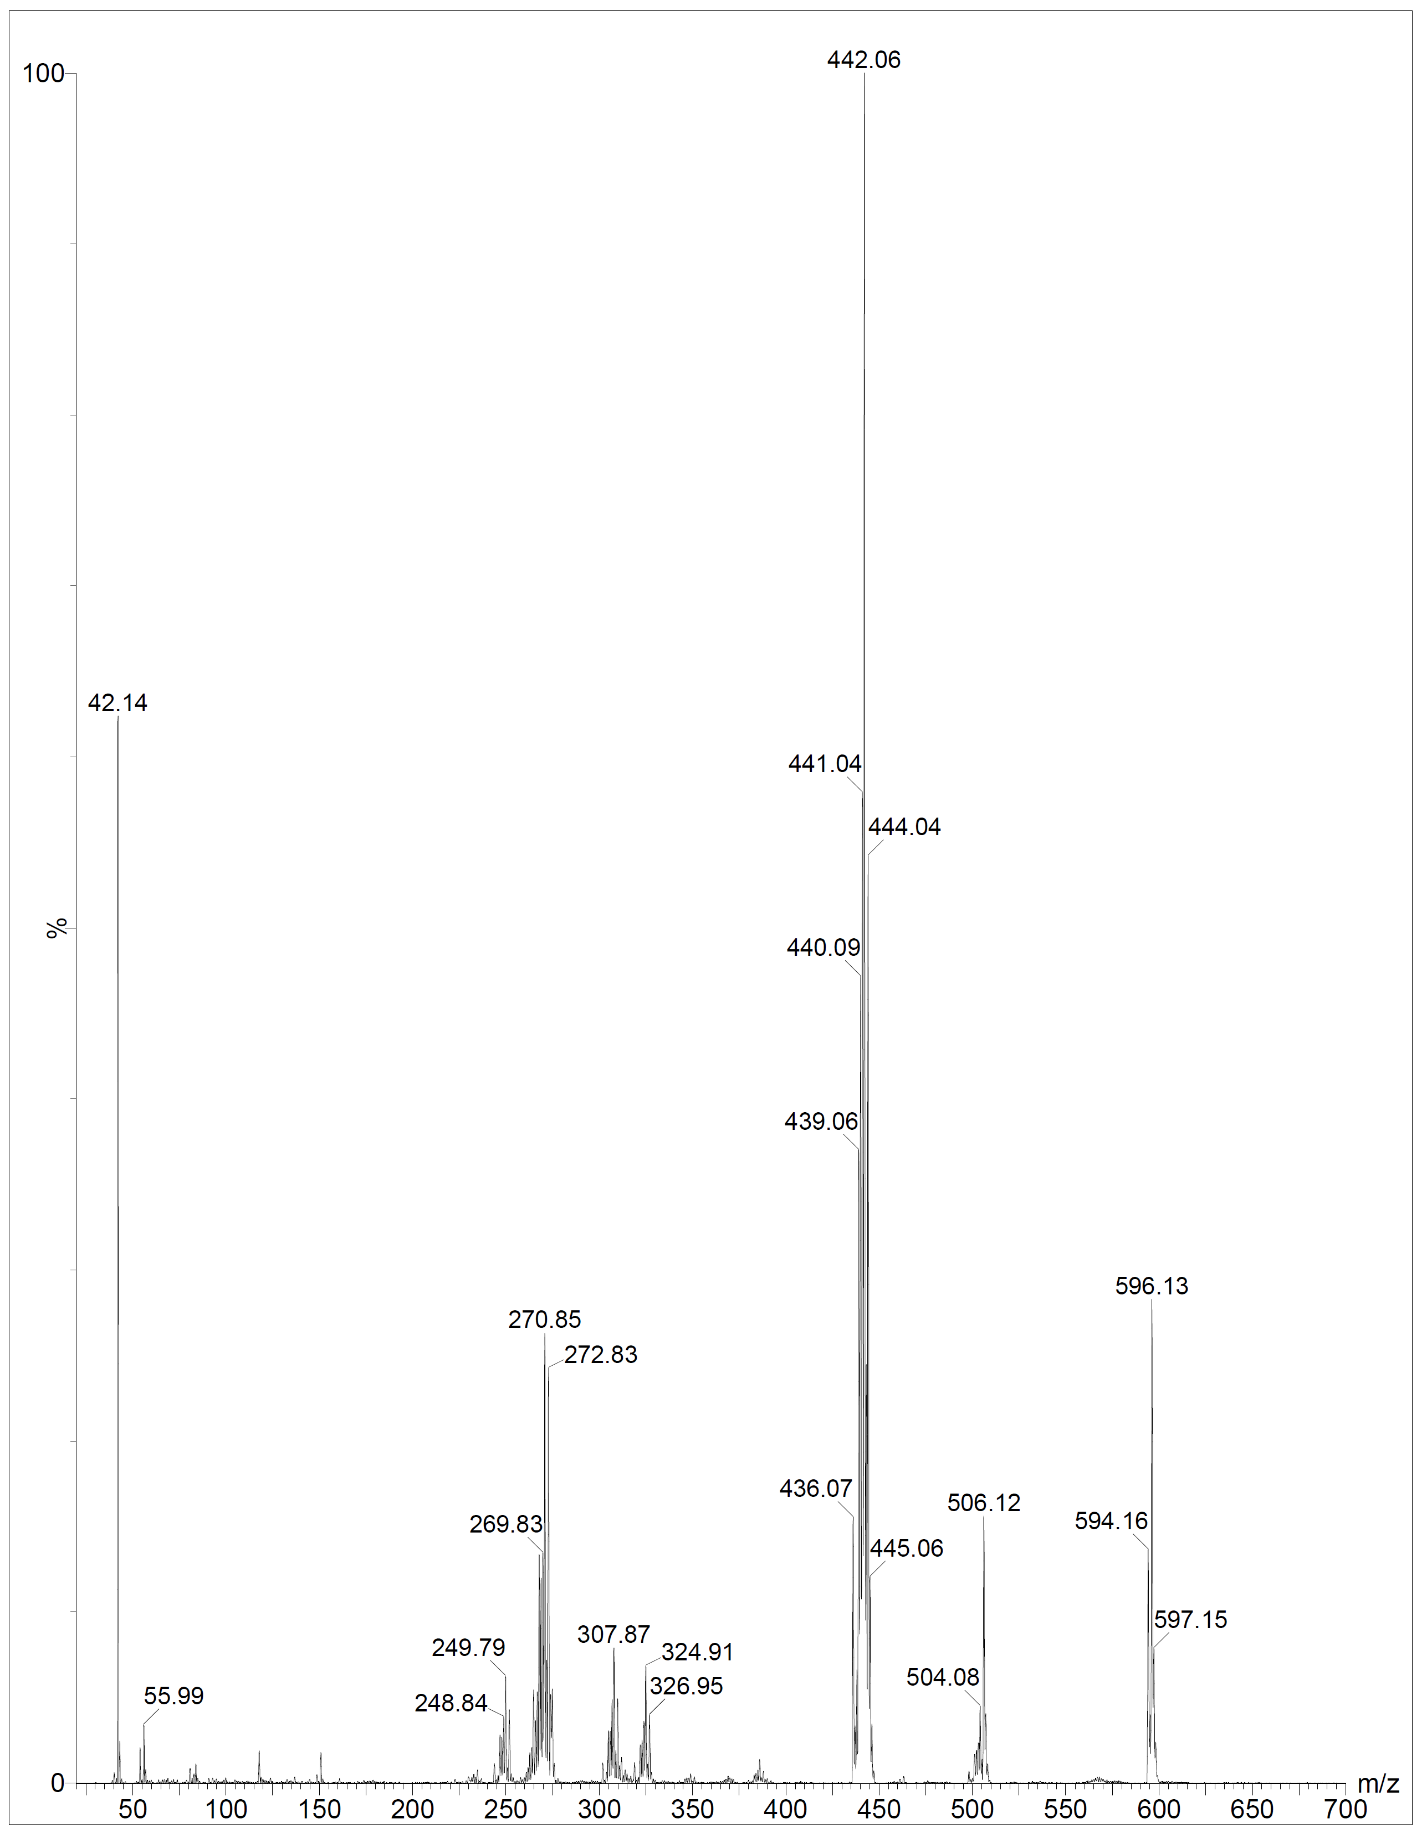
**

**Figure S16**. Mass spectrum of complex **4**.

**
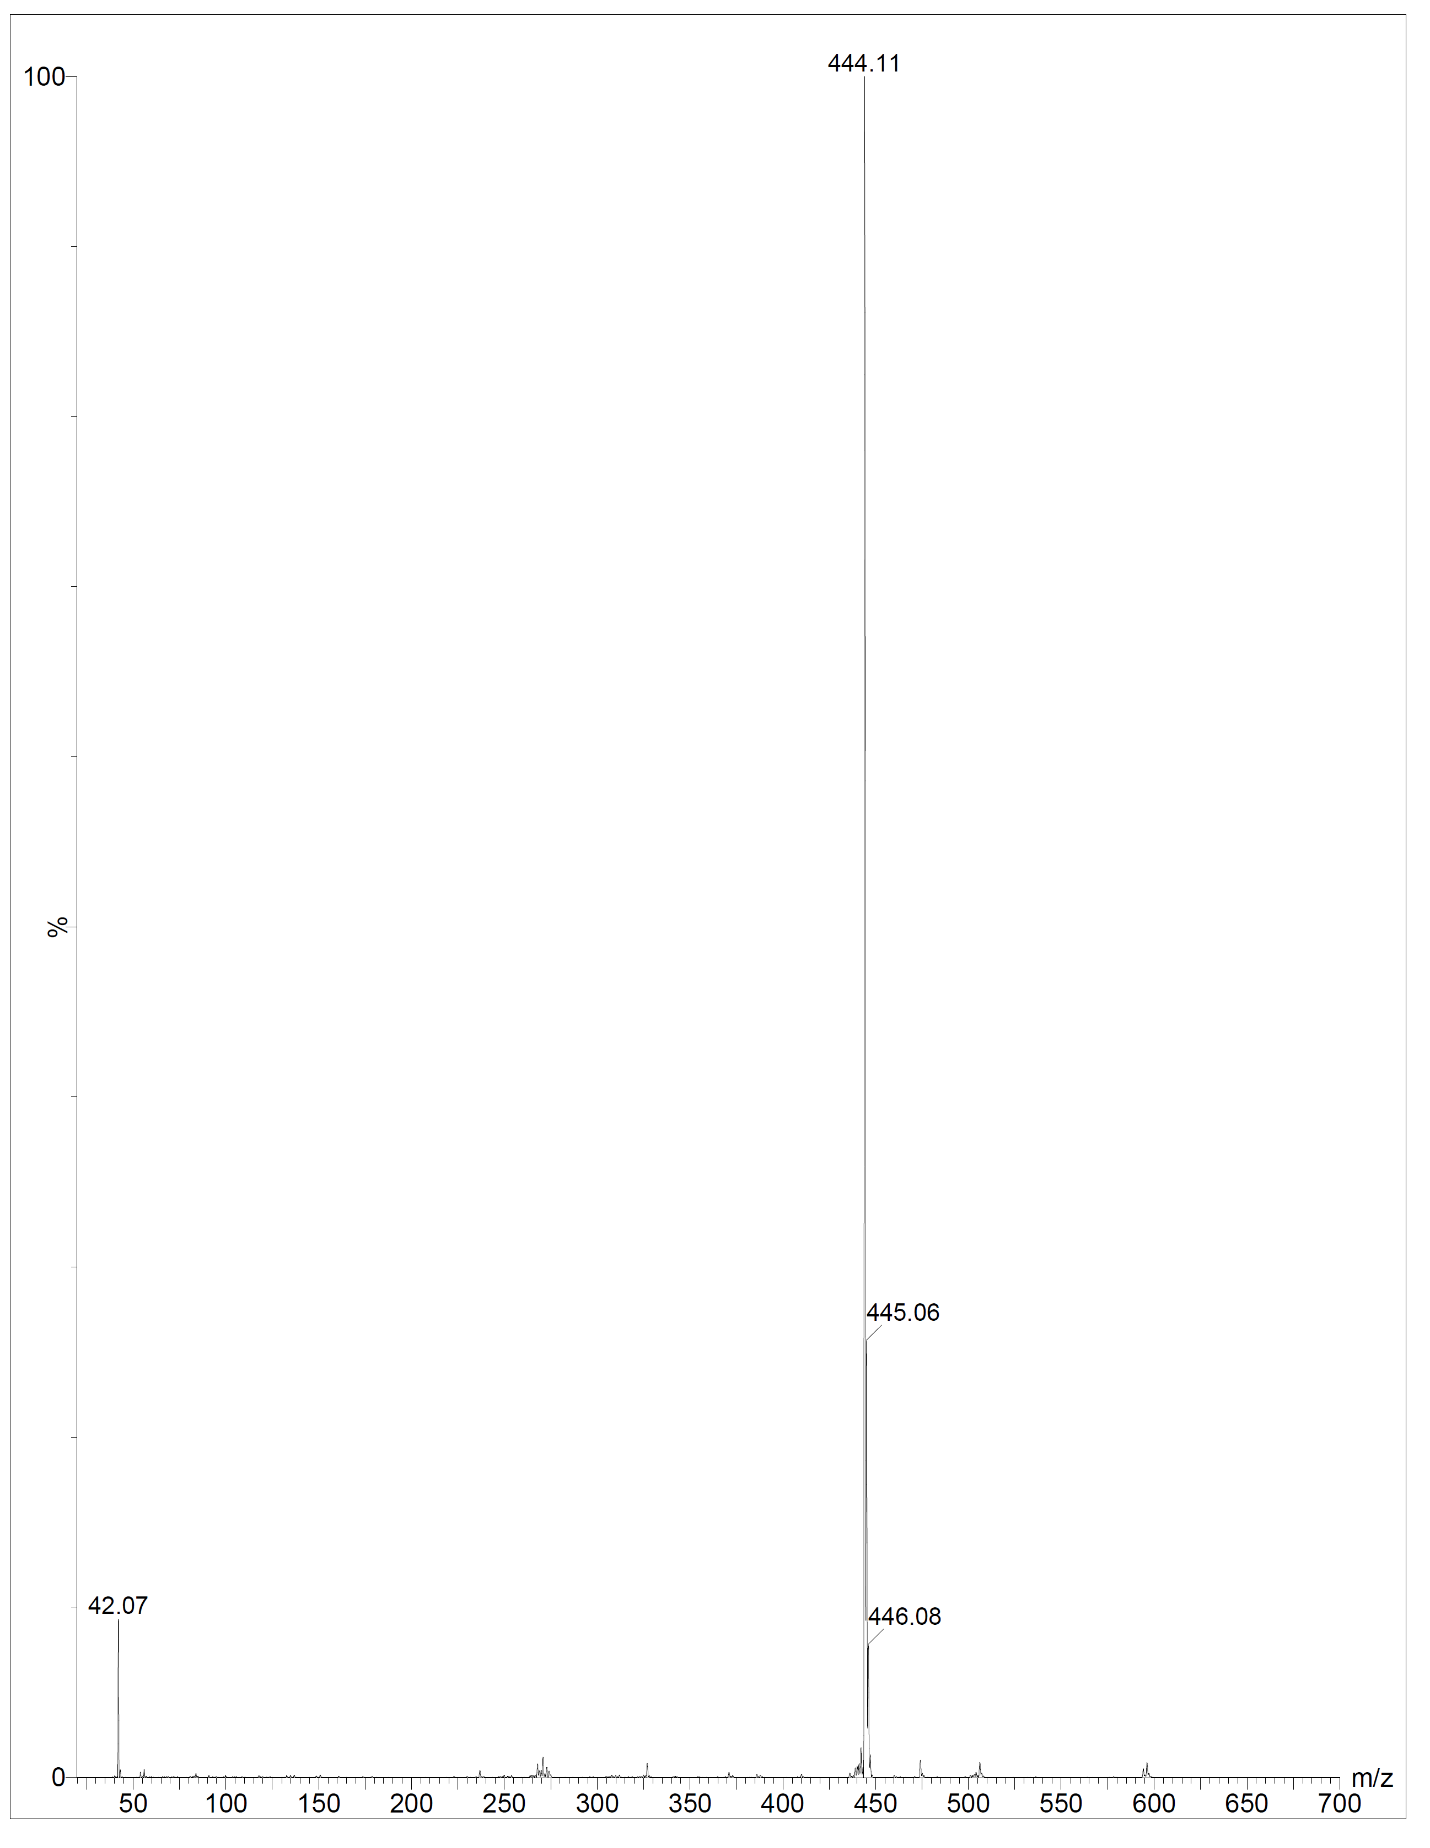
**

**Figure S17**. Mass spectrum of complex **5**.

**
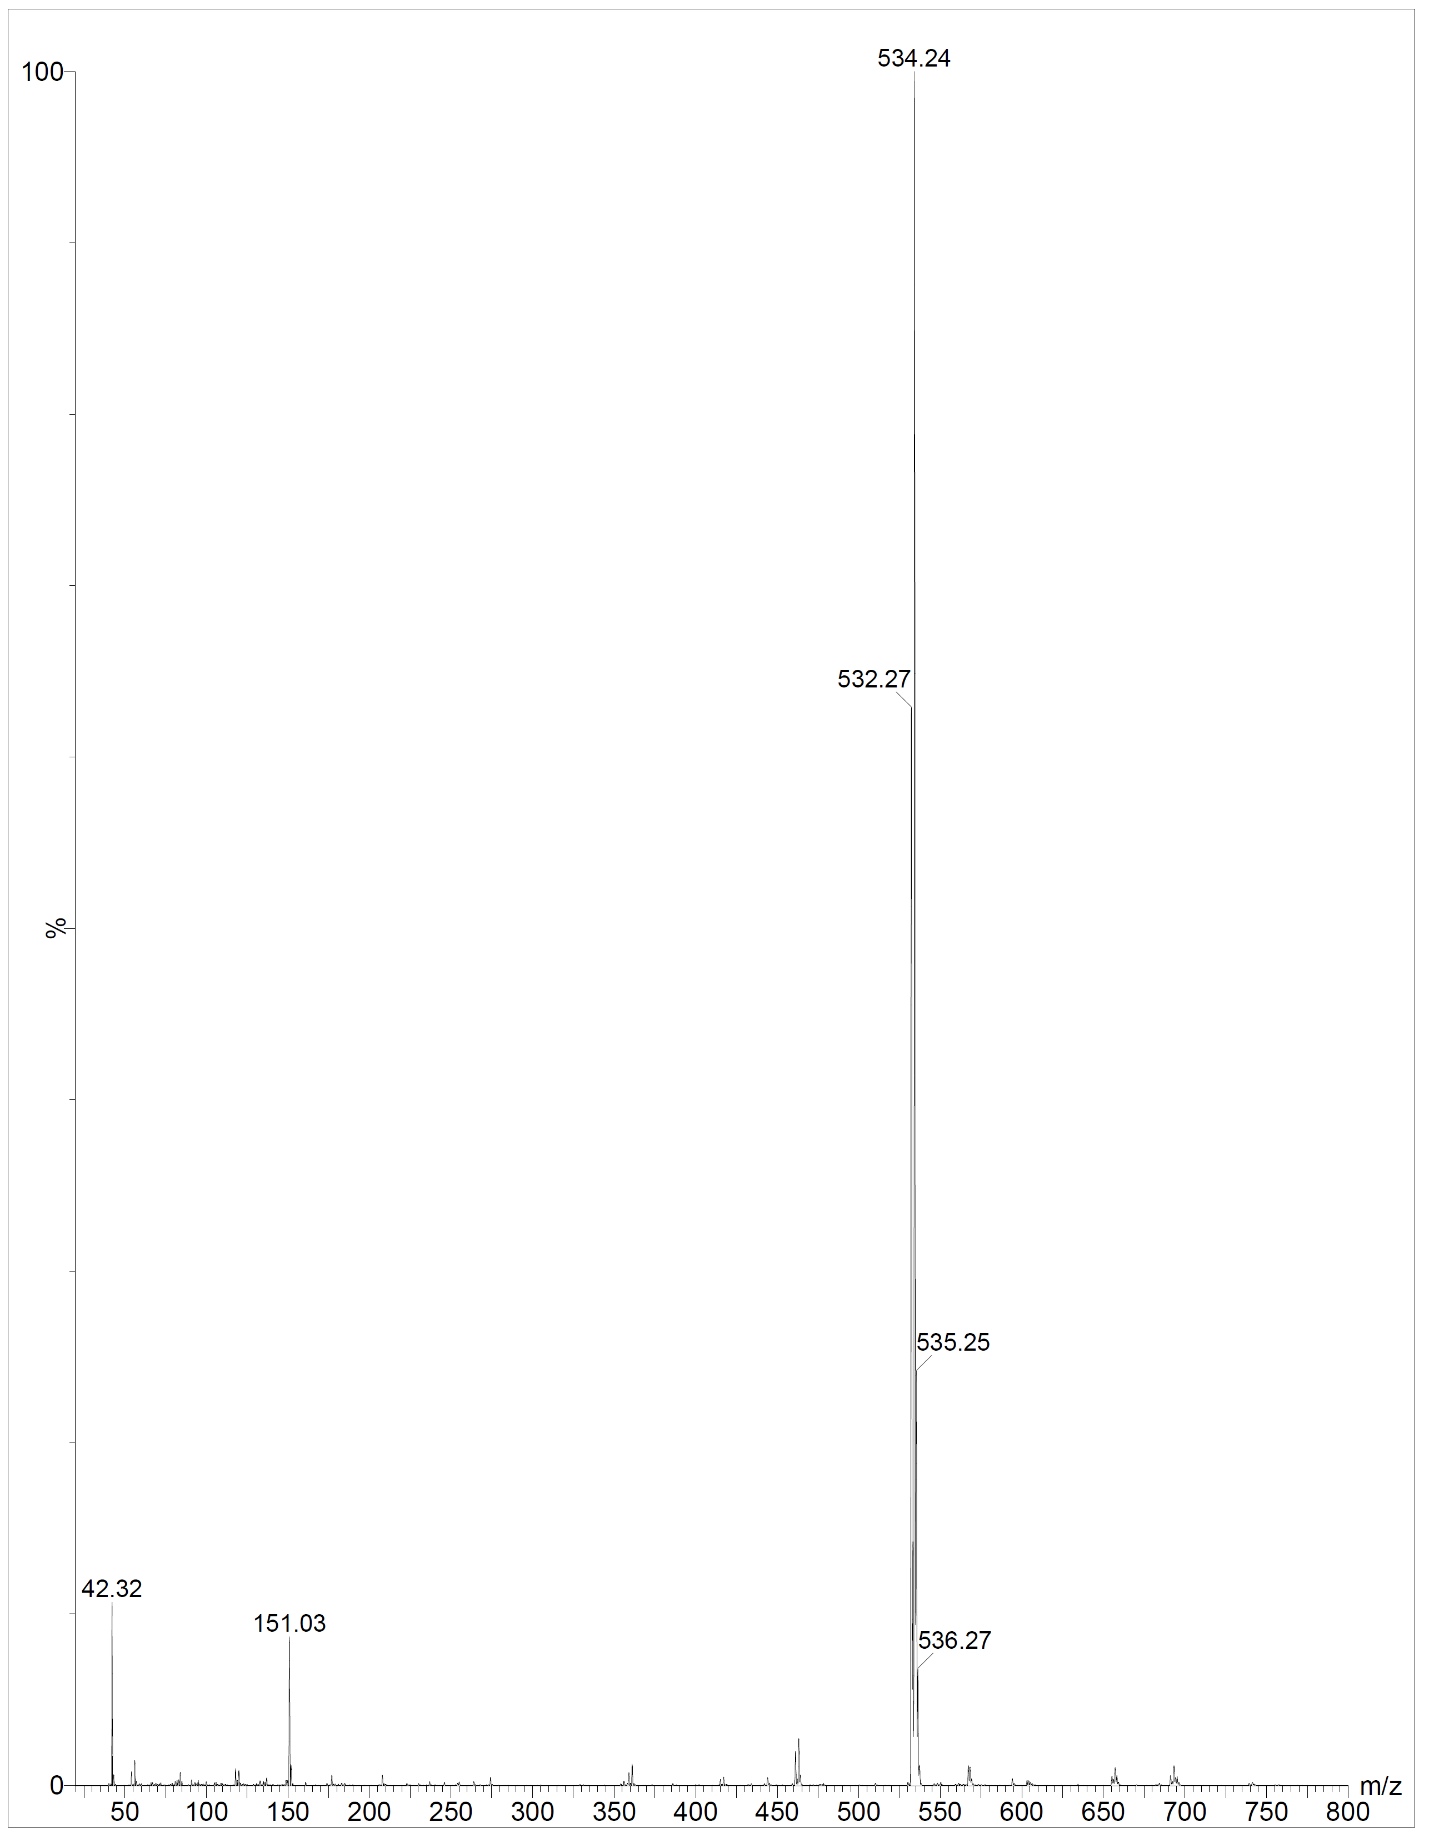
**

**Figure S18**. Mass spectrum of complex **6**.

**
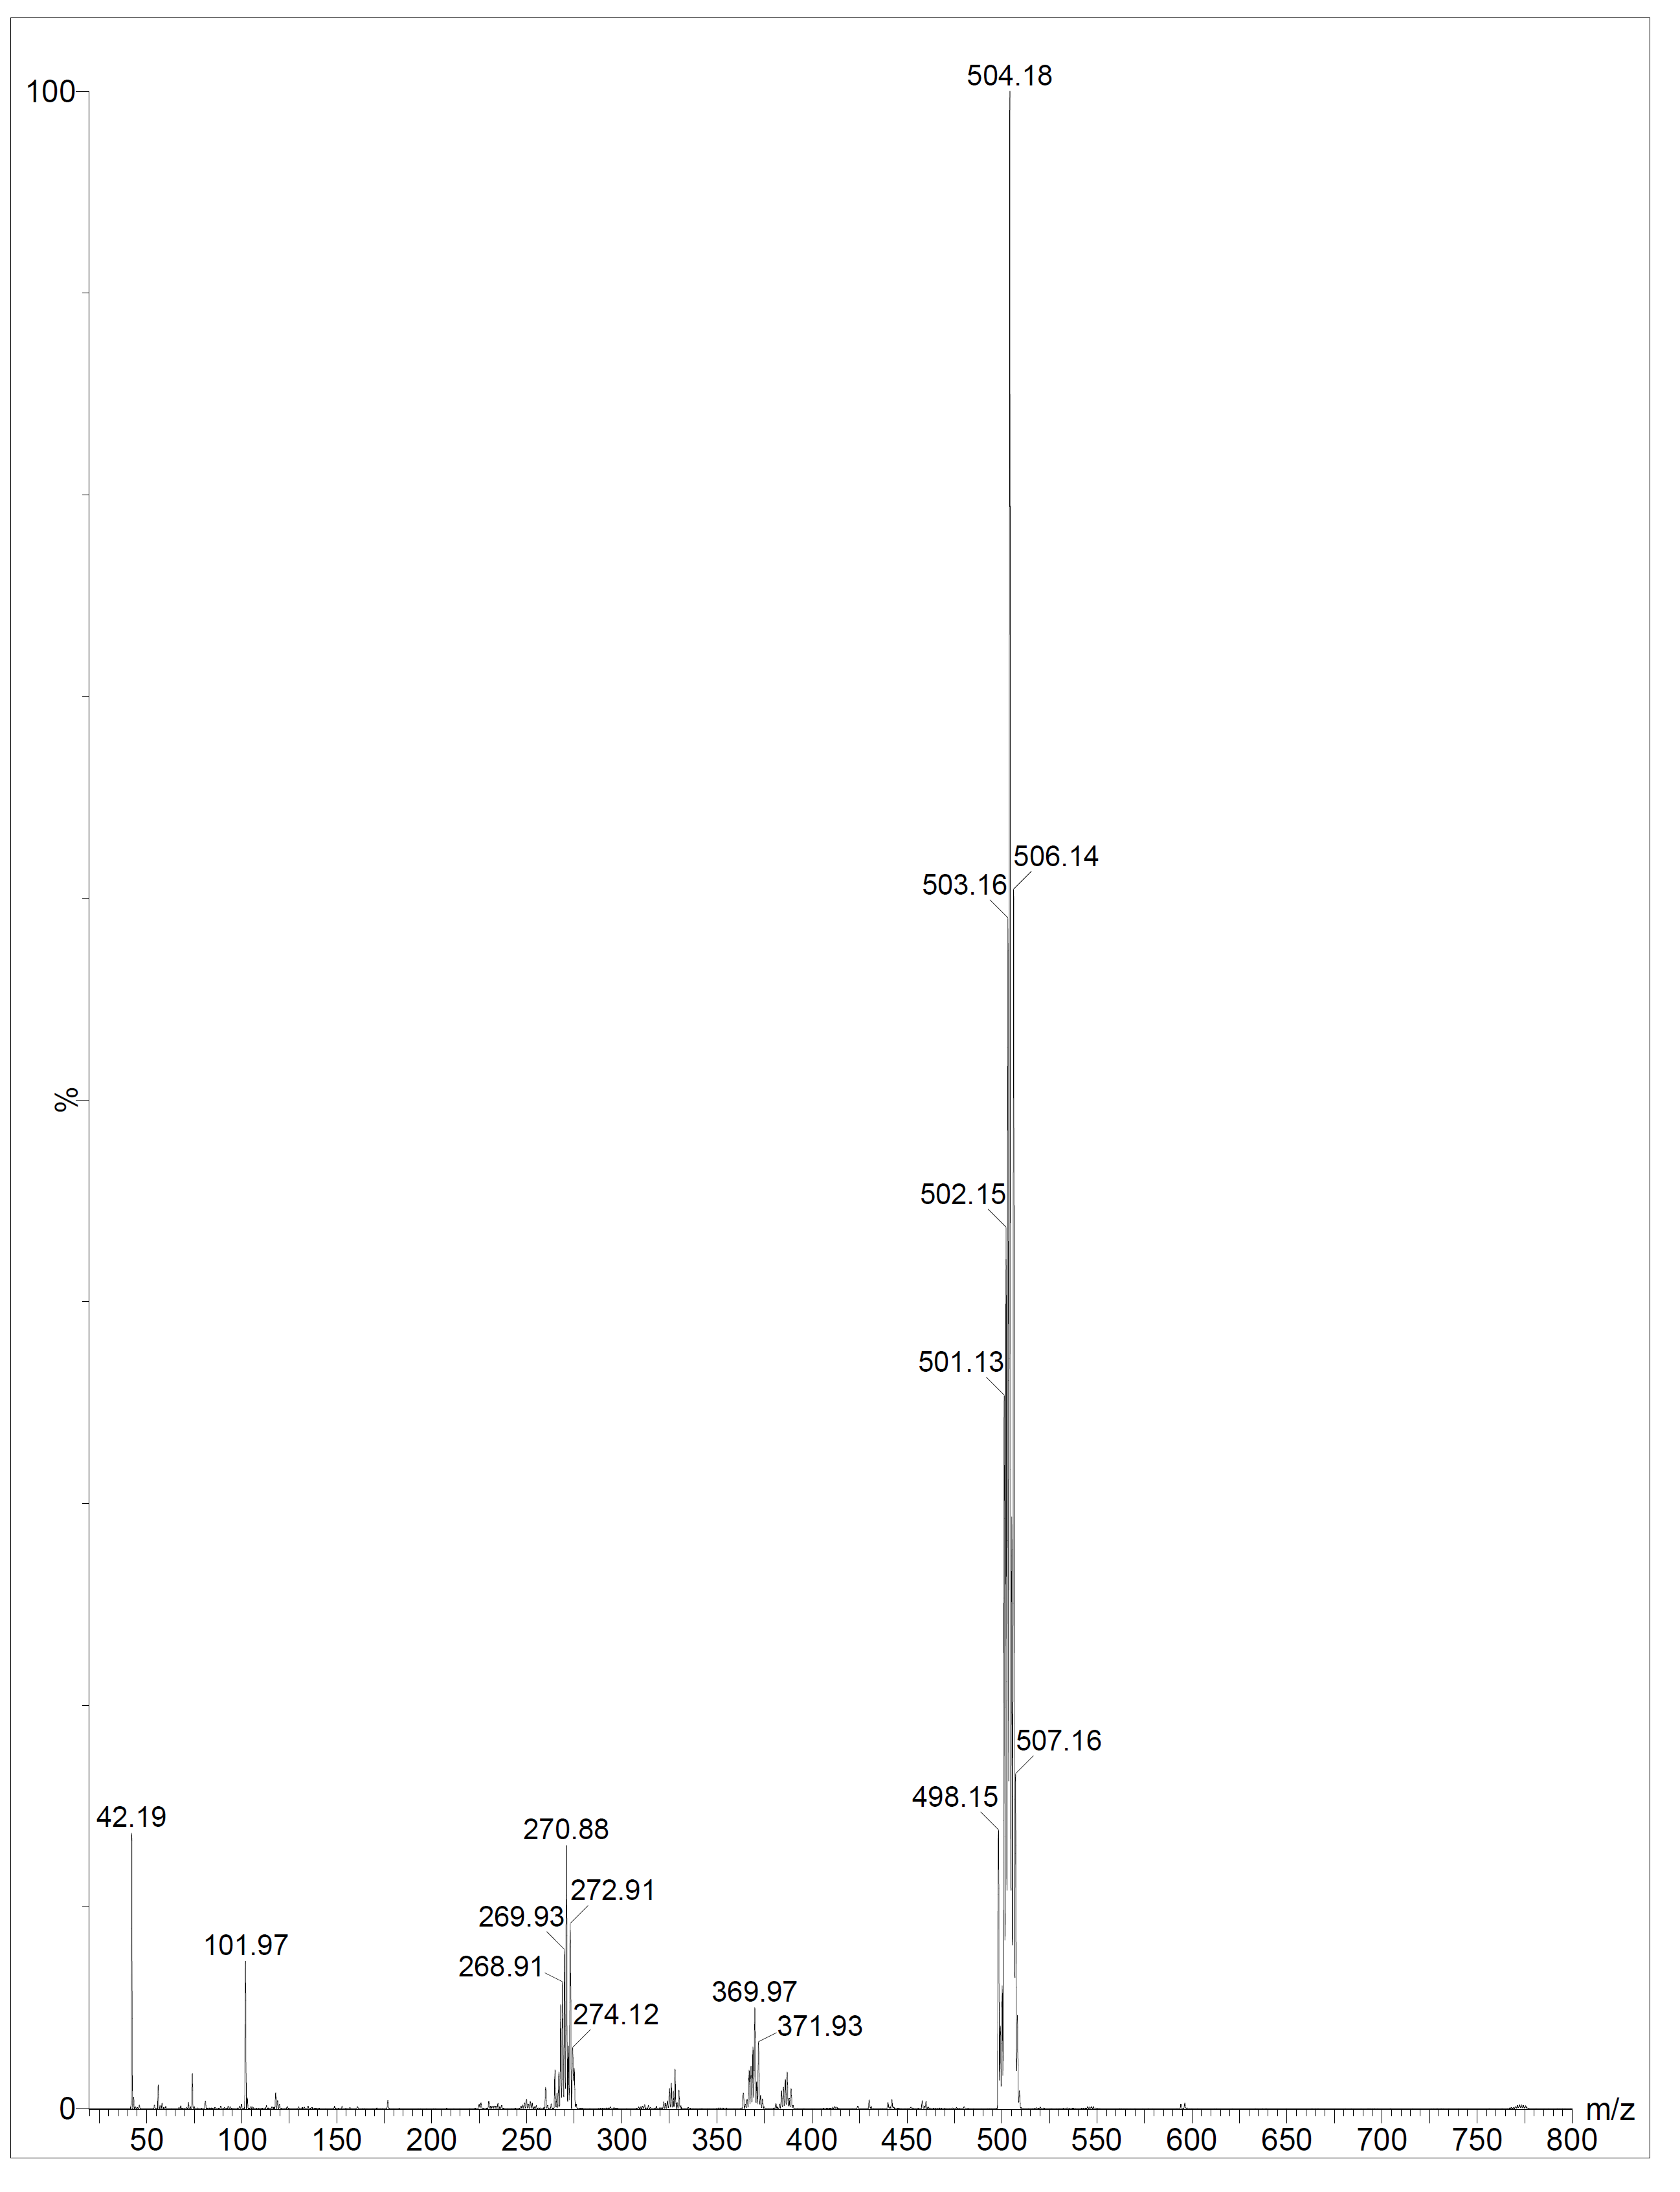
**

**Figure S19**. Mass spectrum of complex **7**.

**
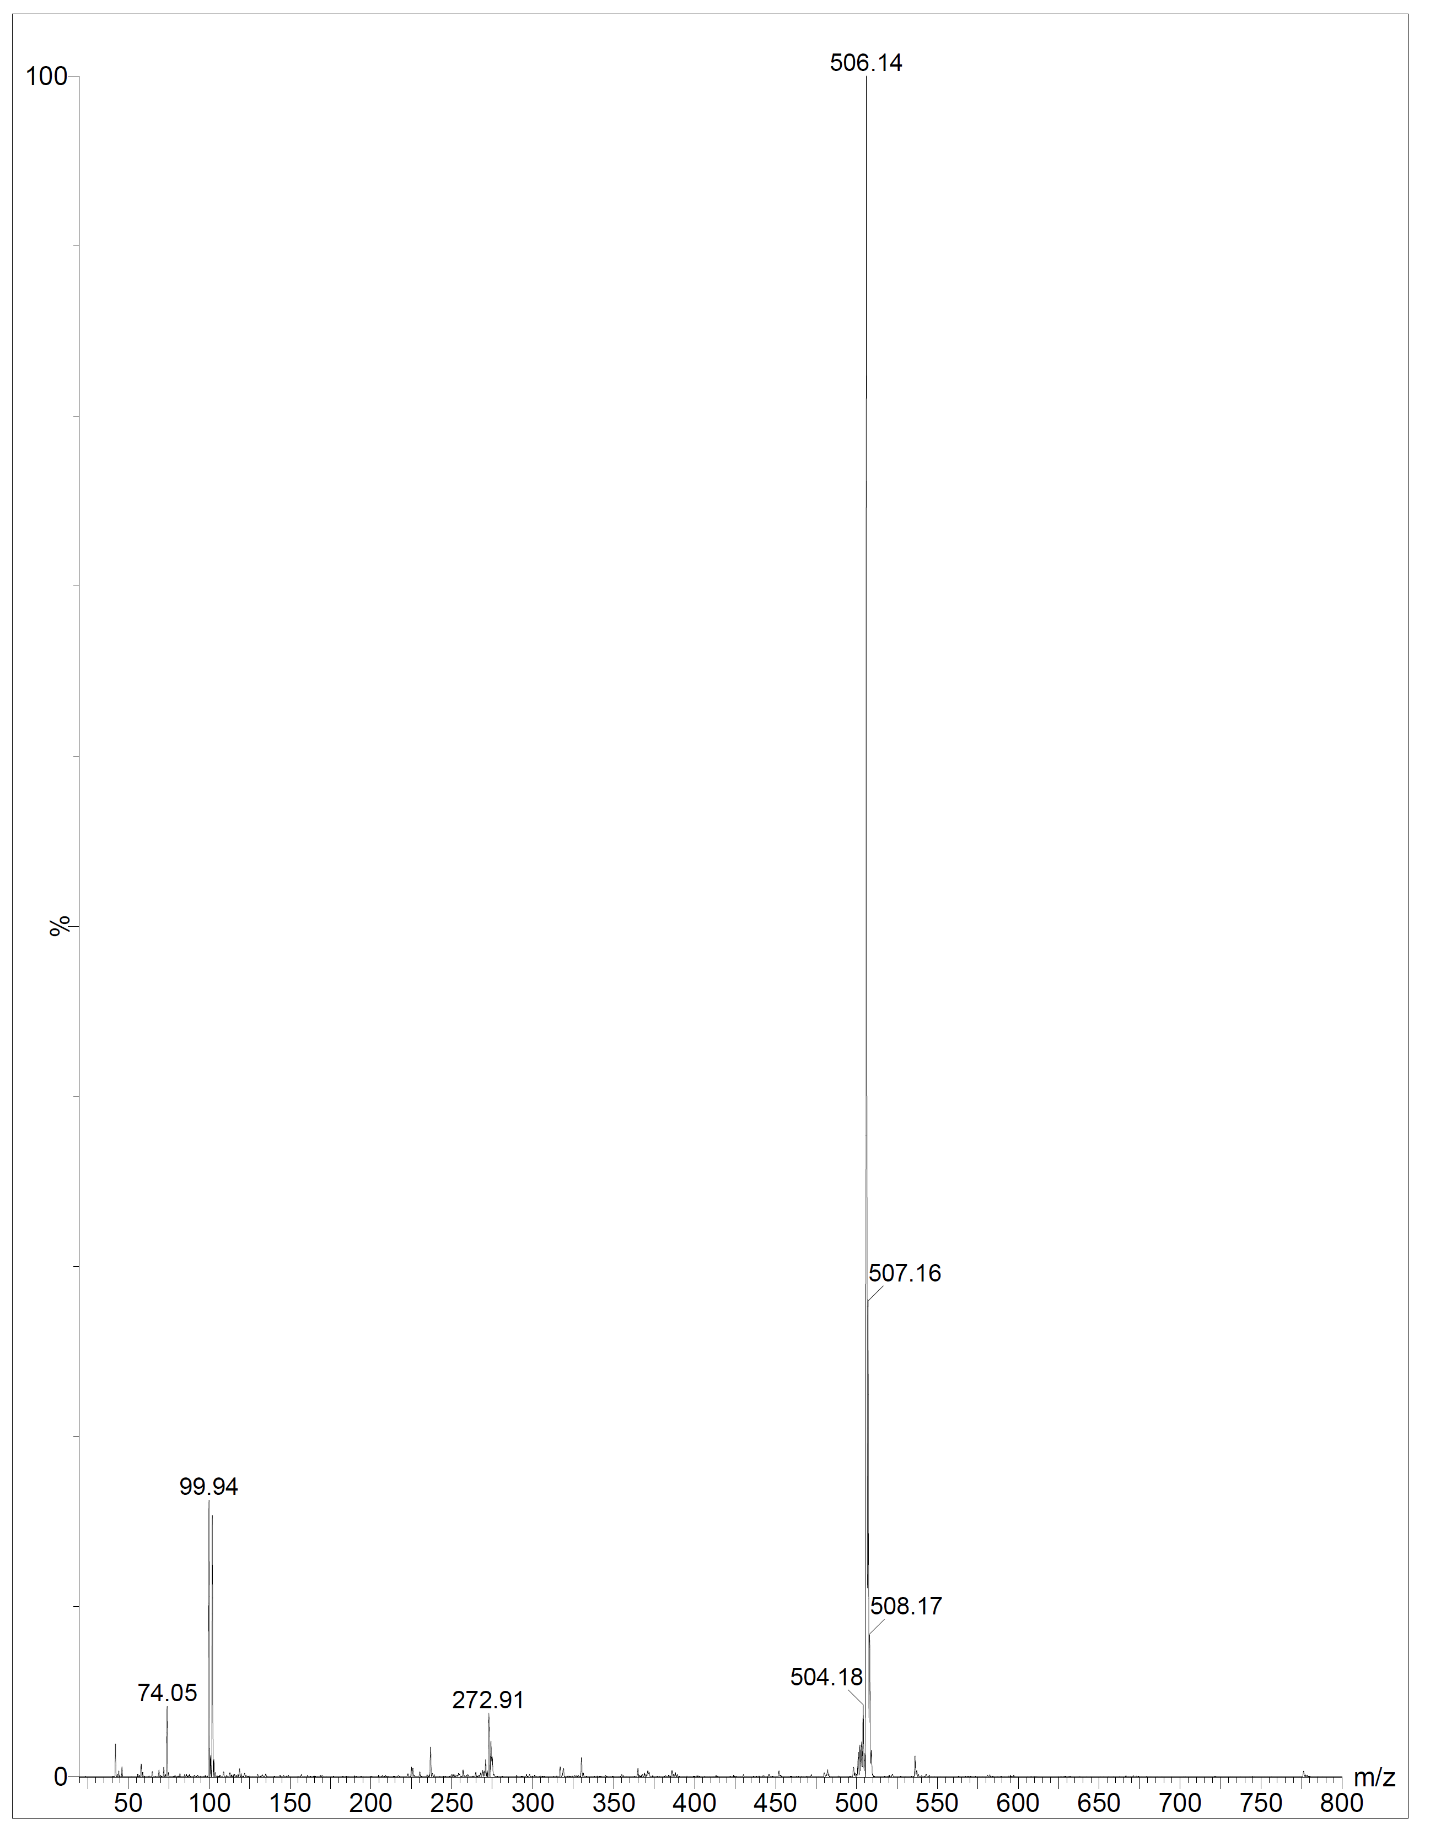
**

**Figure S20**. Mass spectrum of complex **8**.

**
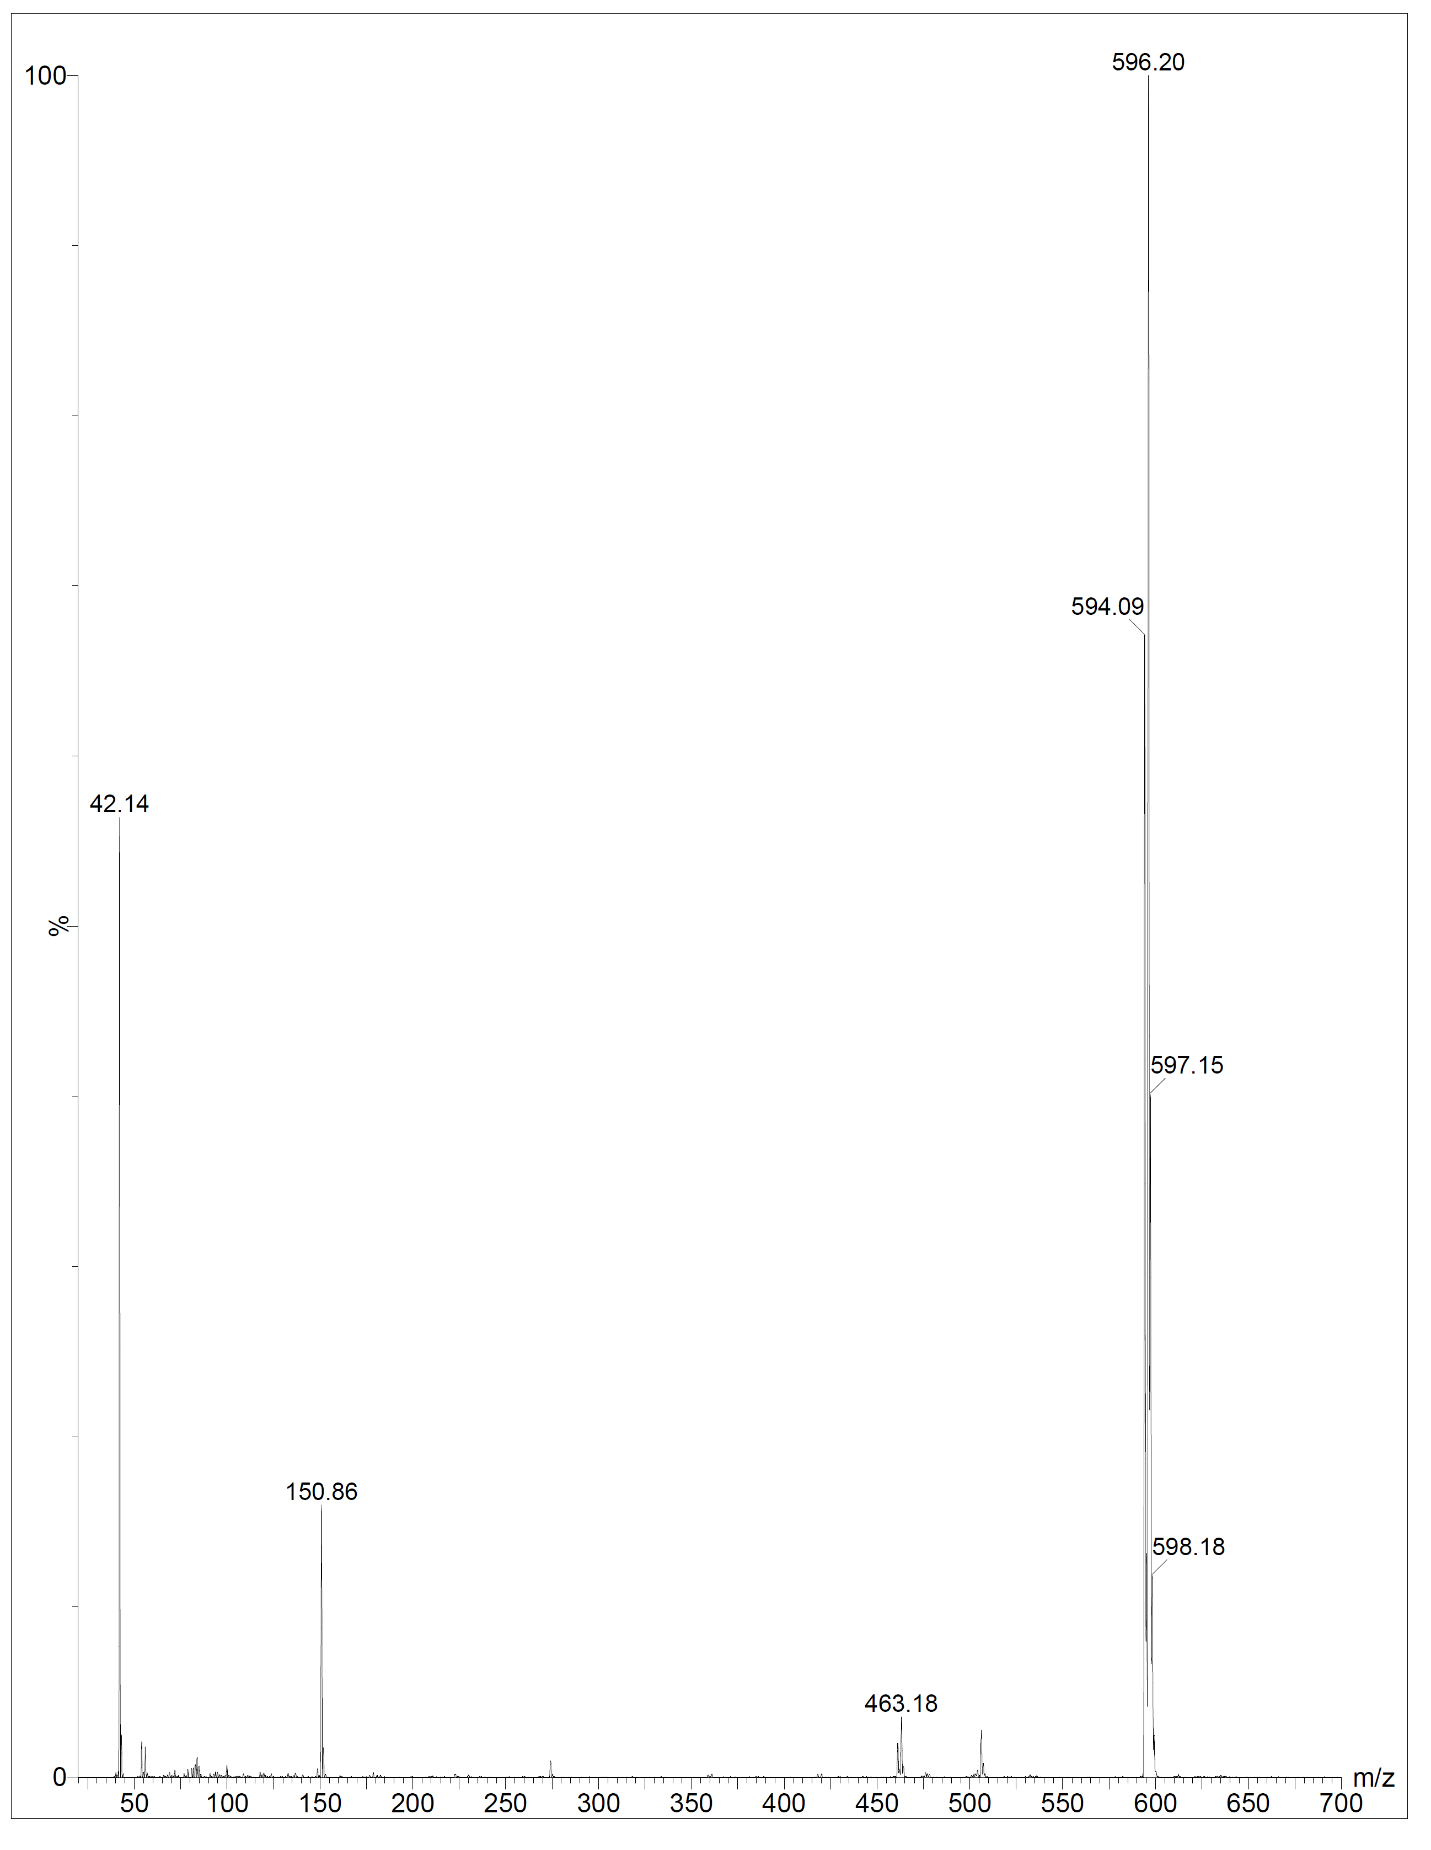
**

**Figure S21**. Mass spectrum of complex **9**.


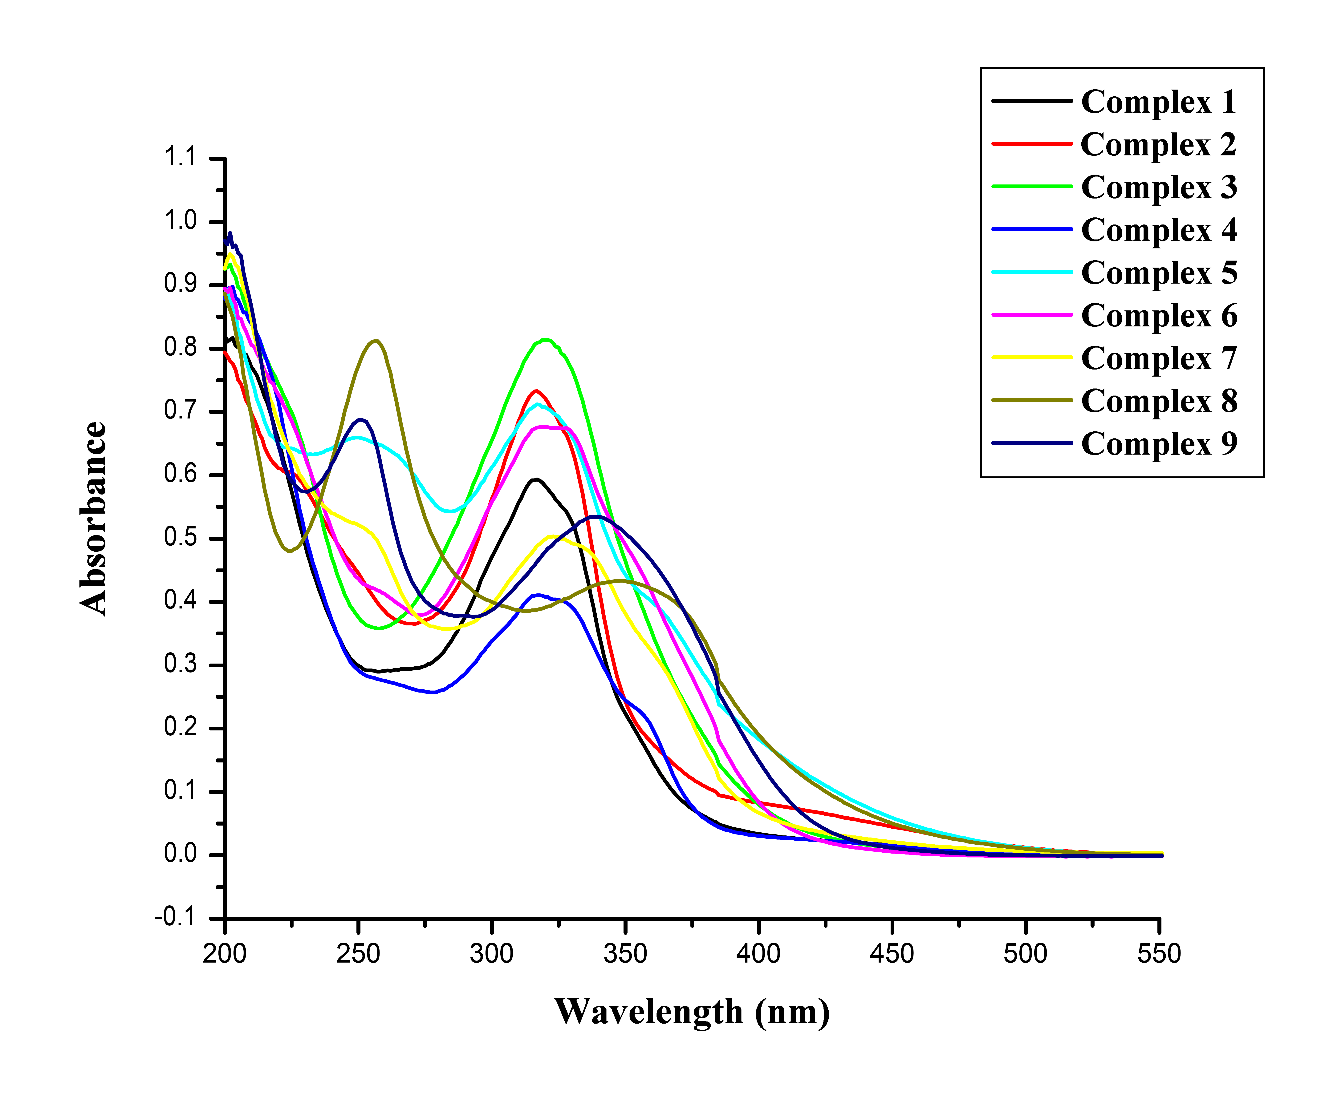


**Figure S22**. UV-Visible spectrum of complexes **1-9**.


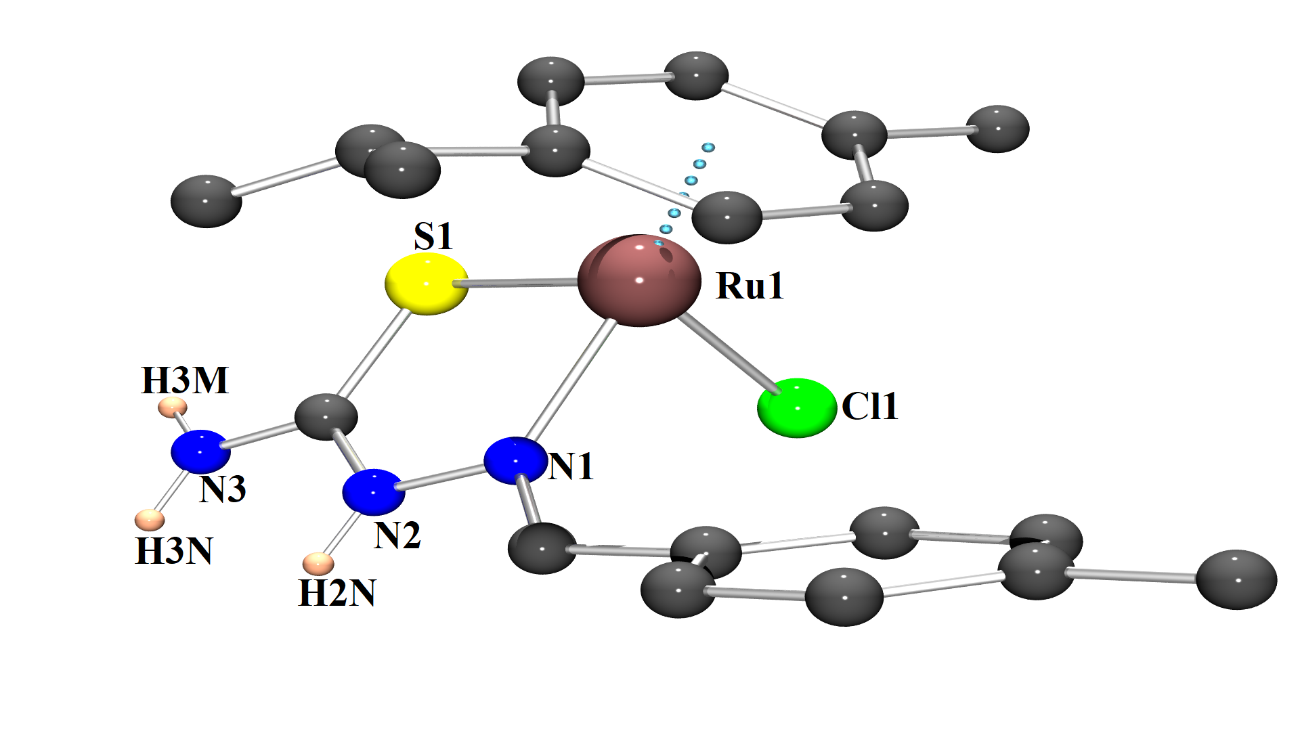


**Figure S23**. Ball and stick diagram of complex **1** presented just to show the mode of bonding.Hydrogen atoms (except NH protons) and counter ions have been omitted for clarity.


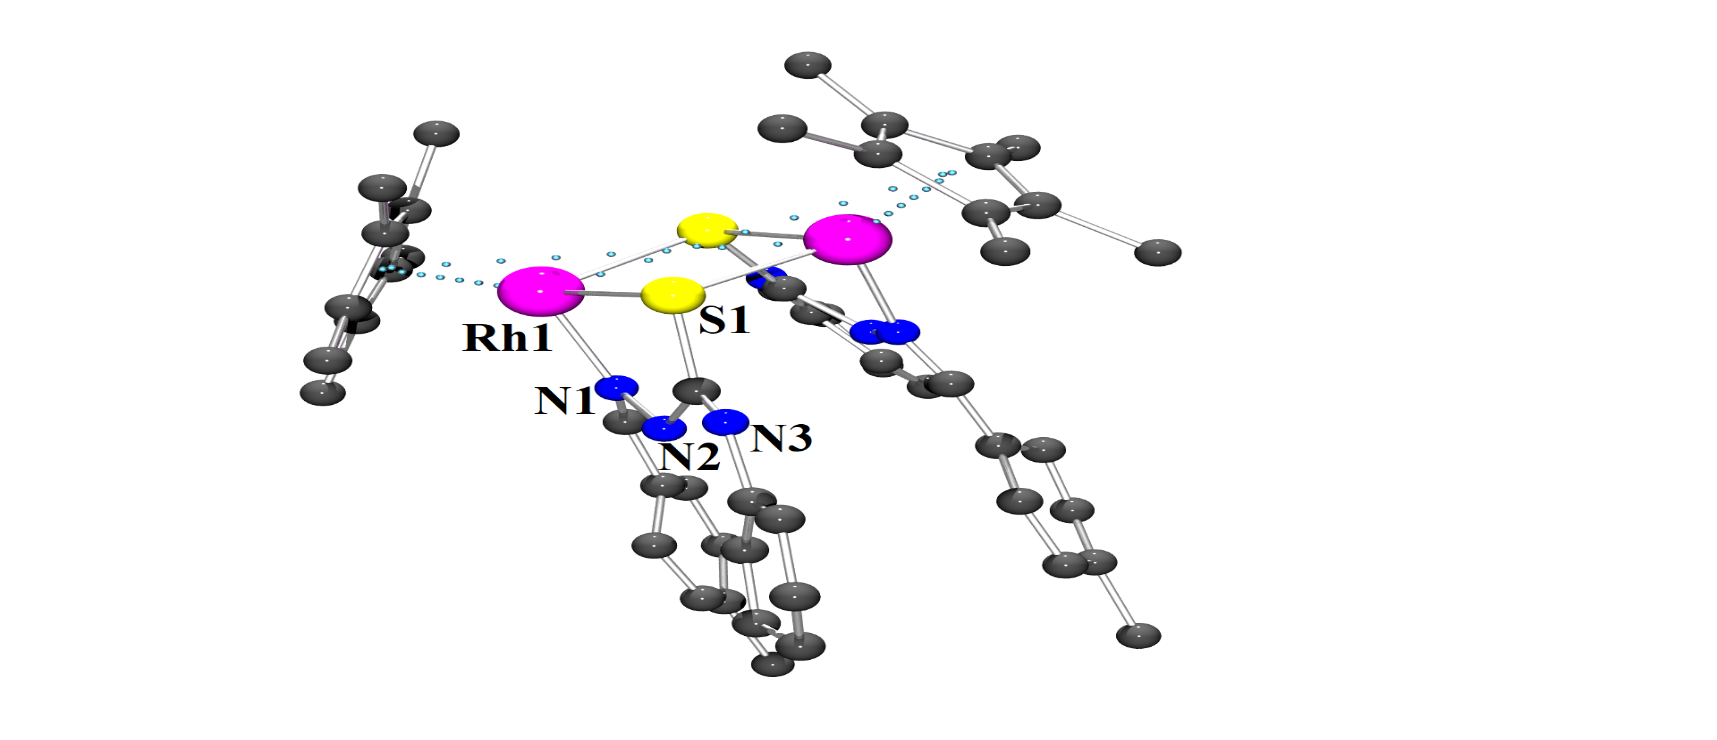


**Figure S24**. Ball and stick diagram of complex **8** presented just to show the mode of bonding. Hydrogen atoms and counter ions have been omitted for clarity.


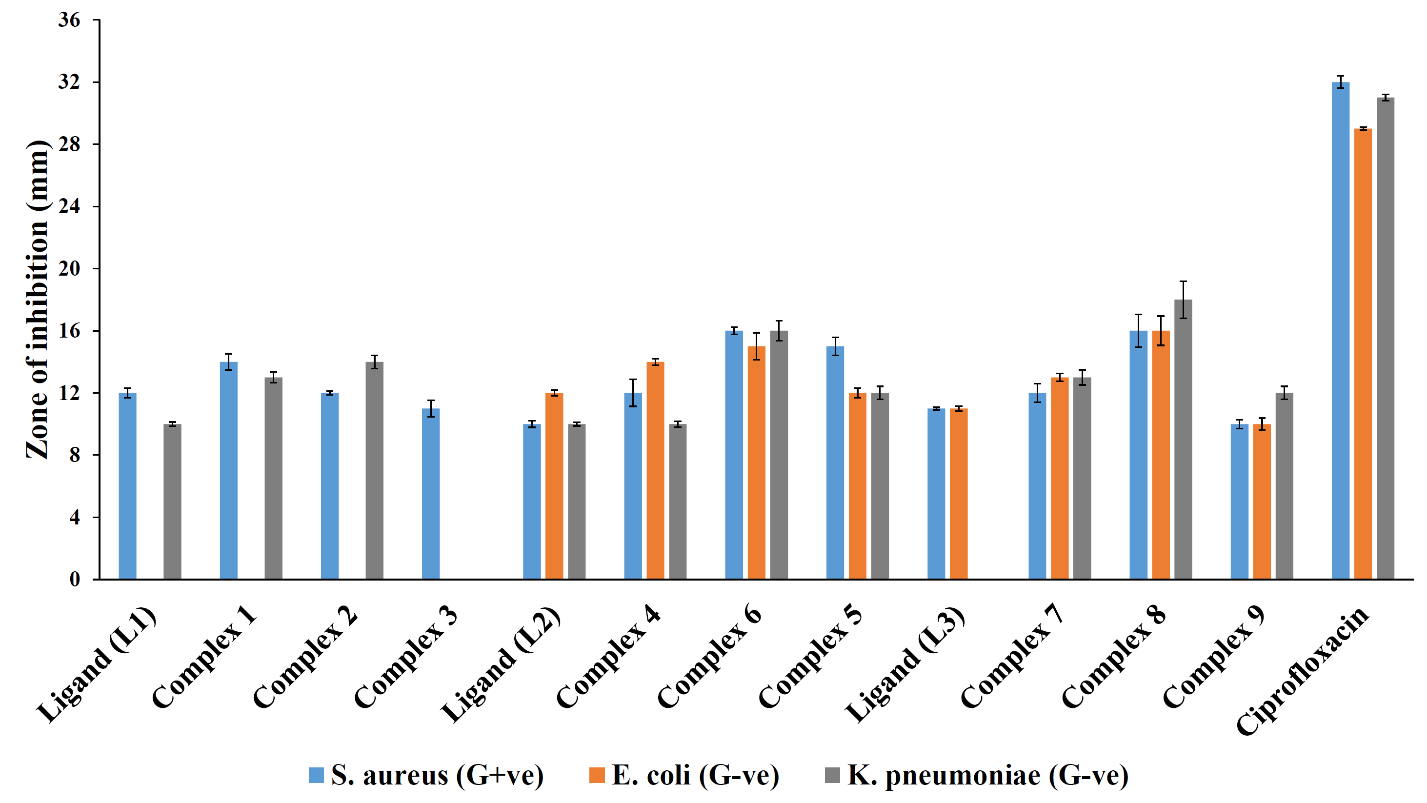


**Figure S25**.Antibacterial results of the compoundsagainst gram-positive and gram-negative bacteria strains with ciprofloxacin as the reference.


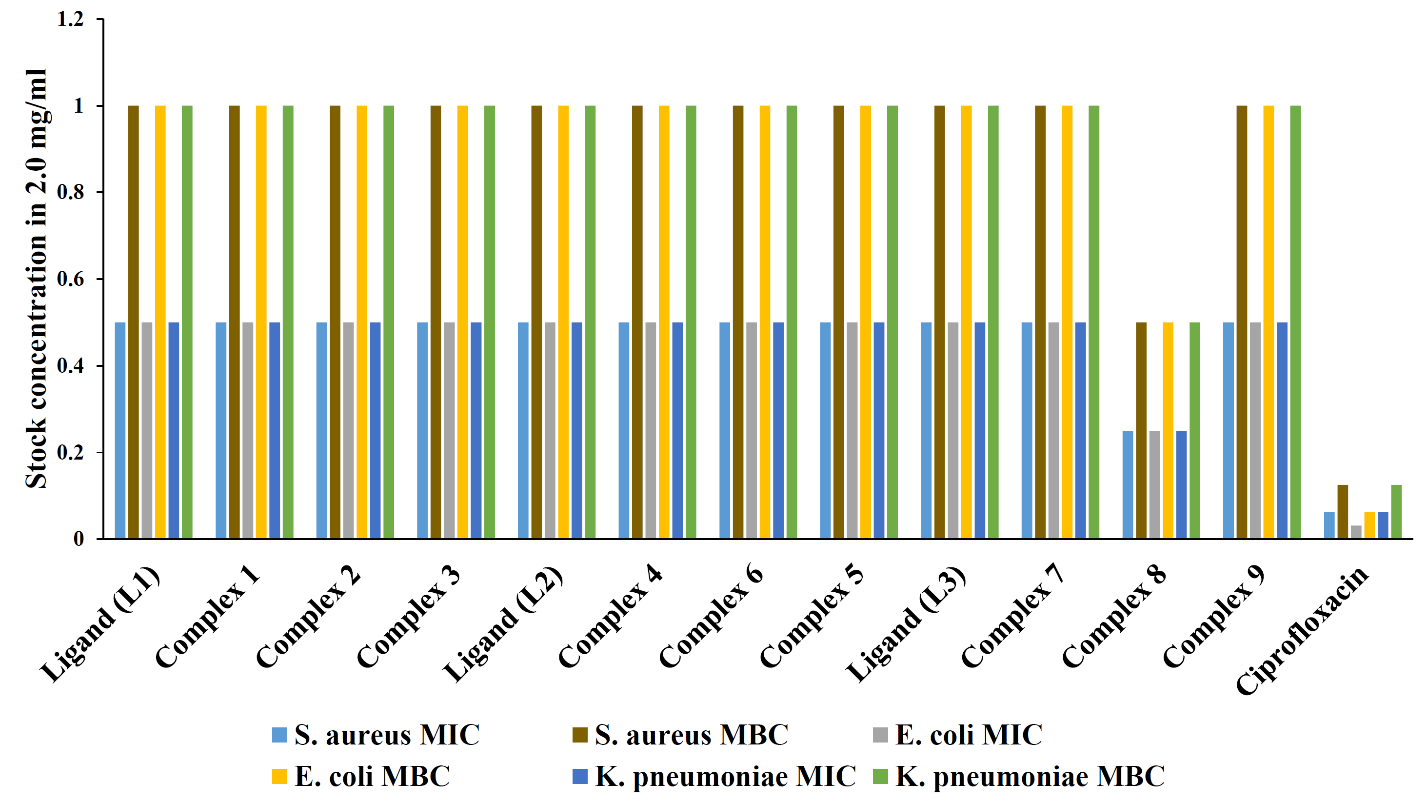


**Figure** **S26**.The minimum inhibitory concentration (MIC)and minimum bactericidal concentration (MBC) of the tested compounds.
